# Supplementary material for: Technical note: apatite and zircon (U-Th)/He analysis usingquadrupole and magnetic sector mass spectrometry
Source: Copernicus journal article supplement (doi:10.5194/gchron-2021-1), 2021-01-25
Supplement: Supplementary file 1 [file TableS1_Data_DUR_VG_Quad.xlsx]

## Sheet: Feuil1
Nom	ID	4He	± s	238U	232Th	147Sm	Weight	4He	± s	238U	232Th	147Sm	eU	Th/U	Sm/Th	Age	s
		(ccSTP)	(ccSTP)	(ng)	(ng)	(ng)	(mg)	(nccSTP/g)	(nccSTP/g)	(ppm)	(ppm)	(ppm)	(ppm)			(Ma)	(Ma)
VG-Line (VG5400)
DURCSP1		1.3359e-09	1.3359e-11	0.0572656	1.21383	0.151334	3.66819	364.186	3.64186	15.6114	330.907	41.2559	95.0496	21.1964	0.83117	32.0095	1.60048
DURCSP6		1.85547e-09	1.85547e-11	0.0870187	1.70186	0.174228	4.38221	423.41	4.2341	19.8573	388.357	39.7581	113.083	19.5574	0.682502	31.2945	1.56472
DURCSP9		1.19091e-09	1.19091e-11	0.0529495	1.08143	0.108401	2.68029	444.321	4.44321	19.7551	403.475	40.4439	116.609	20.4238	0.668259	31.8514	1.59257
DUR CS P11		2.54622e-09	2.54622e-11	0.119989	2.51397	0.228408	4.86415	523.467	5.23467	24.668	516.836	46.9574	148.732	20.9517	0.605703	29.4293	1.47146
DURCSP12		9.0516e-10	9.0516e-12	0.0393218	0.840805	0.10554	2.63196	343.911	3.43911	14.9401	319.46	40.0993	91.6305	21.3827	0.836814	31.3552	1.56776
DURCSP7		1.77558e-09	1.77558e-11	0.092523	1.71414	0.188242	4.02169	441.501	4.41501	23.006	426.223	46.8068	125.323	18.5266	0.732117	29.4355	1.47178
DURPT23		8.8308e-10	8.8308e-12	0.0361204	0.795199	0.0936568	-							22.0153	0.785185	32.5059	1.6253
DVP2A		4.6869e-10	4.6869e-12	0.018389	0.412238	0.0459985	-							22.4176	0.743882	33.3818	1.66909
DVP2B		1.62999e-09	1.62999e-11	0.0777949	1.47803	0.162208	-							18.999	0.731641	31.484	1.5742
DVP2C		3.95115e-09	3.95115e-11	0.176455	3.61382	0.403768	-							20.4801	0.744858	31.6276	1.58138
DVP3Ba		1.05662e-09	1.05662e-11	0.0474145	0.975125	0.0984191	-							20.566	0.672865	34.8635	1.74318
DVP3Da		8.16938e-10	8.16938e-12	0.0396561	0.738361	0.0759354	-							18.6191	0.685621	31.4763	1.57381
DVP3Ea		3.41345e-09	3.41345e-11	0.170262	3.19389	0.283119	-							18.7588	0.590958	30.4585	1.52292
DVP3Fa		1.8115e-09	1.8115e-11	0.0842479	1.59183	0.135885	-							18.8946	0.569094	32.4782	1.62391
DVP3Ga		6.34753e-10	6.34753e-12	0.0279084	0.597187	0.0644542	-							21.3981	0.719531	30.9775	1.54887
DVP3Hb		1.84993e-09	1.84993e-11	0.0855069	1.67824	0.151688	-							19.6269	0.602569	31.671	1.58355
DVP3Ia		2.58826e-09	2.58826e-11	0.123559	2.40866	0.266601	5.24435	493534	4935.34	23.5604	459.287	50.8359	133.815	19.494	0.737897	30.8189	1.54094
DVP3Kc		5.39139e-09	5.39139e-11	0.264386	5.31315	0.449215	10.1456	531403	5314.03	26.0592	523.692	44.277	151.767	20.0962	0.563652	29.2806	1.46403
DVP3La		2.04448e-09	2.04448e-11	0.0935565	1.80151	0.217132	4.21108	485501	4855.01	22.2167	427.803	51.5621	124.915	19.2559	0.803516	32.4679	1.6234
DVP3Nb		3.75793e-09	3.75793e-11	0.16958	3.43498	0.367078	8.20287	458124	4581.24	20.6733	418.754	44.7499	121.197	20.2558	0.71243	31.5917	1.57958
DVP4A		1.39816e-08	1.39816e-10	0.555038	12.5247	1.23333	31.2233	447795	4477.95	17.7764	401.131	39.5002	114.068	22.5654	0.65648	32.8232	1.64116
DVP4Ba		6.86285e-09	6.86285e-11	0.326917	6.82279	0.650346	17.2332	398235	3982.35	18.9703	395.911	37.738	114.008	20.8701	0.635464	29.2042	1.46021
DVP4Ca		6.81915e-09	6.81915e-11	0.299818	6.6245	0.55332	14.09	483971	4839.71	21.2788	470.156	39.2704	134.136	22.095	0.556842	30.1787	1.50894
DVP4Ea		8.05702e-09	8.05702e-11	0.357795	7.43338	0.623629	14.2881	563896	5638.96	25.0415	520.249	43.6467	149.923	20.7755	0.559304	31.4558	1.57279
DVP4Fa		8.12881e-09	8.12881e-11	0.34516	7.44612	0.728621	13.9546	582519	5825.19	24.7345	533.596	52.2137	152.824	21.5729	0.65235	31.8681	1.5934
DVP4Ga		3.71062e-09	3.71062e-11	0.173015	3.43869	0.298966	6.28209	590667	5906.67	27.5409	547.38	47.5903	158.936	19.8752	0.579613	31.0754	1.55377
DVP4Ia		7.85252e-09	7.85252e-11	0.354518	7.22947	0.610782	14.7265	533223	5332.23	24.0734	490.916	41.475	141.914	20.3924	0.563233	31.4218	1.57109
DV19P7B		2.97742e-09	2.97742e-11	0.136686	2.93554	0.261804	7.78962	382229	3822.29	17.5472	376.852	33.6094	108.16	21.4765	0.594563	29.6589	1.48295
DV19P7C		5.39999e-09	5.39999e-11	0.256136	5.27456	0.502237	12.2192	441926	4419.26	20.9617	431.661	41.1022	124.766	20.5928	0.634792	29.7262	1.48631
DV19P7A		2.56456e-09	2.56456e-11	0.116431	2.41747	0.252491	6.06282	422998	4229.98	19.2041	398.737	41.6458	115.109	20.7631	0.696296	30.8443	1.54222
DV19P6A		4.63699e-09	4.63699e-11	0.207042	4.71745	0.444541	11.3683	407887	4078.87	18.2122	414.965	39.1035	117.999	22.785	0.628223	29.0168	1.45084
DV19P6C		1.09874e-08	1.09874e-10	0.458101	9.89252	0.927908	23.6992	463617	4636.17	19.3298	417.42	39.1536	119.706	21.5946	0.625326	32.5066	1.62533
He-Line (Quad)
D19P5B	295	1.9684e-09	1.9684e-11	0.0877994	1.80536	0.1853	-							20.5623	0.684261	31.6489	1.58244
D19P5C	304	2.07586e-09	2.07586e-11	0.100264	2.03672	0.208091	-							20.3136	0.681131	29.5235	1.47618
D19P5E	349	1.08312e-09	1.08312e-11	0.0495541	1.03507	0.10669	-							20.8878	0.687162	30.4557	1.52278
D19P5F	311	1.74973e-09	1.74973e-11	0.0710343	1.55255	0.179401	-							21.8564	0.770348	33.0464	1.65232
D19P5H	326	2.32506e-09	2.32506e-11	0.107283	2.33432	0.268612	-							21.7586	0.767138	29.1847	1.45923
D19P6A	353	2.46023e-09	2.46023e-11	0.103545	2.26606	0.262279	-							21.8848	0.771614	31.8415	1.59207
D19P6B	363	1.44814e-09	1.44814e-11	0.0584069	1.29527	0.149761	-							22.1766	0.770809	32.8601	1.643
D19P6C	369	2.29766e-09	2.29766e-11	0.11148	2.42169	0.25129	-							21.7231	0.691778	27.7943	1.38971
D19P6D	374	1.94789e-09	1.94789e-11	0.0834557	1.83031	0.205503	-							21.9315	0.748518	31.2239	1.56119
D19P6E	380	5.06555e-09	5.06555e-11	0.217523	4.89199	0.511278	-							22.4896	0.696755	30.5034	1.52517
D19P6F	388	2.35111e-09	2.35111e-11	0.0979843	2.17866	0.24632	-							22.2348	0.753735	31.7312	1.58656
D19P6G	394	2.16704e-09	2.16704e-11	0.0909552	1.99203	0.238367	-							21.9012	0.797735	31.9084	1.59542
D19P7A	400	2.35434e-09	2.35434e-11	0.105729	2.23188	0.221234	-							21.1094	0.660831	30.7568	1.53784
D19P7B	401	4.6971e-09	4.6971e-11	0.200091	4.58365	0.42658	-							22.9078	0.620437	30.2766	1.51383
D19P7C	408	6.27654e-09	6.27654e-11	0.266527	5.95377	0.56245	-							22.3383	0.629798	31.0234	1.55117
D19P7D	409	6.89466e-09	6.89466e-11	0.293298	6.39604	0.684185	-							21.8073	0.713134	31.5978	1.57989
D19P7E	417	5.45176e-09	5.45176e-11	0.233571	5.14598	0.545435	-							22.0317	0.706616	31.1061	1.55531
D19P7H	426	4.22551e-09	4.22551e-11	0.191448	4.20179	0.321547	-							21.9474	0.510174	29.5127	1.47563
D19P7J	444	2.17006e-09	2.17006e-11	0.0966762	1.99227	0.216806	-							20.6076	0.725492	31.6288	1.58144
D19P8A	455	3.80437e-09	3.80437e-11	0.177194	3.84451	0.387285	-							21.6967	0.671581	28.9834	1.44917
D19P8C	465	2.42992e-09	2.42992e-11	0.107886	2.32343	0.229482	-							21.5361	0.658457	30.5945	1.52972
D19P8D	466	1.39131e-09	1.39131e-11	0.0631559	1.26327	0.150731	-							20.0024	0.795454	31.8153	1.59076
D19P8E	474	8.70508e-10	8.70508e-12	0.0382492	0.774685	0.0886267	-							20.2536	0.76269	32.5316	1.62658
D19P8F	475	1.84365e-09	1.84365e-11	0.0821573	1.63531	0.194166	-							19.9046	0.791558	32.5398	1.62699
D19P8G	479	1.69598e-09	1.69598e-11	0.0735147	1.53171	0.148339	-							20.8355	0.645635	32.2133	1.61067
D19P8H	480	1.01421e-09	1.01421e-11	0.0461401	0.893261	0.108932	-							19.3598	0.812994	32.6091	1.63046
D19P8I	488	1.87277e-09	1.87277e-11	0.0870549	1.68234	0.200035	-							19.325	0.792689	31.9616	1.59808
D19P9A	491	1.76141e-09	1.76141e-11	0.0850342	1.57242	0.168434	-							18.4916	0.714117	31.9055	1.59528
D19P9B	492	1.36579e-09	1.36579e-11	0.0607454	1.20673	0.137842	-							19.8653	0.761518	32.6563	1.63281
D19P9C	503	8.64349e-10	8.64349e-12	0.03844	0.78415	0.0739644	-							20.3993	0.628829	31.9537	1.59769
D19P9D	504	4.94403e-10	4.94403e-12	0.0216692	0.460086	0.0554587	-							21.2323	0.803599	31.3591	1.56795
D19P9E	507	3.49496e-10	3.49496e-12	0.0226316	0.333106	0.0303184	-							14.7186	0.606781	28.5232	1.42616
D19P9F	508	1.30588e-09	1.30588e-11	0.0635269	1.16494	0.117041	-							18.3377	0.669798	31.8793	1.59396
D19P9G	513	1.03843e-09	1.03843e-11	0.0534578	0.934214	0.0947485	-							17.4757	0.676137	31.321	1.56605
D19P9I	528	5.3814e-10	5.3814e-12	0.0241414	0.498559	0.0526984	-							20.6516	0.704677	31.3547	1.56774
D19P9J	529	7.29328e-10	7.29328e-12	0.0360117	0.676008	0.0825837	-							18.7719	0.814425	30.8125	1.54062
D19P10	539	2.91417e-09	2.91417e-11	0.14216	2.7813	0.27975	-							19.5646	0.670549	30.1518	1.50759
D19P11	547	8.18562e-10	8.18562e-12	0.040682	0.773741	0.0706351	-							19.0192	0.608602	30.2907	1.51454
D19P12	548	8.43607e-10	8.43607e-12	0.0381865	0.745744	0.0752303	-							19.529	0.67253	32.5429	1.62714
D19P13	558	4.98268e-10	4.98268e-12	0.0262861	0.443569	0.0468335	-							16.8747	0.703888	31.4335	1.57167
D19P14	573	8.98524e-10	8.98524e-12	0.0482509	0.801228	0.0892073	-							16.6055	0.742254	31.2784	1.56392
D19P15	580	1.4016e-09	1.4016e-11	0.0643856	1.36978	0.139439	-							21.2747	0.678642	29.8725	1.49363
D19P16	730	3.25149e-09	3.25149e-11	0.158833	3.07254	0.325484	-							19.3445	0.70622	30.3909	1.51955
D19P17	738	3.17103e-09	3.17103e-11	0.146943	2.8423	0.299749	-							19.3429	0.703066	32.0393	1.60197
D19P18	739	1.78113e-09	1.78113e-11	0.0815043	1.5805	0.164044	-							19.3916	0.691949	32.3782	1.61891
D19P19	747	2.64666e-09	2.64666e-11	0.123894	2.45357	0.239799	-							19.8037	0.651565	31.109	1.55545
D19P20	748	2.00074e-09	2.00074e-11	0.0905008	1.98554	0.188309	-							21.9395	0.632267	29.5676	1.47838
D19P21	756	2.6759e-09	2.6759e-11	0.13529	2.60919	0.295676	-							19.286	0.755473	29.4355	1.47178
D19P22	757	2.02374e-09	2.02374e-11	0.0969452	1.82925	0.197524	-							18.8689	0.719871	31.6283	1.58141
D19P23	765	1.42925e-09	1.42925e-11	0.0659761	1.26829	0.148873	-							19.2235	0.782539	32.3249	1.61624
D19P24	766	4.17763e-09	4.17763e-11	0.186921	3.85318	0.34616	-							20.614	0.598917	31.4868	1.57434
D19P25	773	2.63403e-09	2.63403e-11	0.130217	2.37621	0.23138	-							18.2481	0.649157	31.4955	1.57478
D19P26	774	1.97801e-09	1.97801e-11	0.0877529	1.71054	0.193564	-							19.4926	0.754398	33.2533	1.66267
D19P27	612	1.83897e-09	1.83897e-11	0.0916445	1.71911	0.167684	-							18.7585	0.650274	30.5504	1.52752
D19P28	643	6.00193e-09	6.00193e-11	0.290325	5.69614	0.468226	-							19.6199	0.548003	30.3395	1.51698
D19P29	652	3.50616e-09	3.50616e-11	0.168409	3.357	0.292571	-							19.9336	0.581017	30.1568	1.50784
D19P30	673	6.30445e-09	6.30445e-11	0.303562	5.81134	0.457874	-							19.1438	0.525265	31.1002	1.55501
D19P31	680	1.08073e-09	1.08073e-11	0.0479312	0.999285	0.109611	-							20.8483	0.731261	31.4661	1.57331
D19P32	690	1.66232e-09	1.66232e-11	0.076954	1.54543	0.142702	-							20.0825	0.61559	31.0974	1.55487
D19P33	699	1.11388e-09	1.11388e-11	0.050467	1.00976	0.105576	-							20.0083	0.69704	31.8695	1.59348
D19P34	708	1.4141e-09	1.4141e-11	0.0634203	1.26509	0.13042	-							19.9477	0.687277	32.2766	1.61383
D19P35	717	1.2426e-09	1.2426e-11	0.0566168	1.13529	0.11692	-							20.0522	0.686576	31.6335	1.58168
D19P36	726	2.62353e-09	2.62353e-11	0.149577	2.70733	0.289719	-							18.0999	0.71342	27.4898	1.37449
D19P37	835	1.4598e-09	1.4598e-11	0.0669871	1.29724	0.113244	-							19.3655	0.581976	32.3259	1.6163
D19P38	843	2.92538e-09	2.92538e-11	0.140896	2.7506	0.232978	-							19.5223	0.564672	30.5959	1.52979
D19P39	844	1.39289e-09	1.39289e-11	0.0669746	1.32952	0.131241	-							19.8512	0.658084	30.2265	1.51133
D19P40	853	2.32429e-09	2.32429e-11	0.113555	2.20527	0.226508	-							19.4203	0.684748	30.2899	1.5145
D19P41	862	4.23279e-09	4.23279e-11	0.208207	3.95886	0.322404	-							19.0141	0.542923	30.6131	1.53065
D19P42	863	5.98157e-09	5.98157e-11	0.2864	5.44756	0.513024	-							19.0208	0.627834	31.4389	1.57195
D19P43	872	4.84229e-09	4.84229e-11	0.230354	4.4171	0.3588	-							19.1753	0.541532	31.4362	1.57181
D19P44	874	2.35214e-08	2.35214e-10	1.0617	21.209	1.52309	-							19.9765	0.478757	32.0361	1.6018
D19P18B	916	2.06698e-08	2.06698e-10	0.998402	21.1449	1.86531	42.282	488857	4888.57	23.6129	500.094	44.116	143.856	21.1788	0.588104	28.5188	1.42594
D19P18C	925	8.03646e-09	8.03646e-11	0.320143	7.94167	0.734475	22.7519	353222	3532.22	14.0711	349.055	32.2819	98.0057	24.8066	0.616558	30.2594	1.51297
D19P18E	935	3.90882e-08	3.90882e-10	1.91042	39.7736	3.48744	75.7367	516107	5161.07	25.2246	525.157	46.0469	151.492	20.8193	0.584548	28.5893	1.42947
D19P18G	943	3.67858e-08	3.67858e-10	1.58431	33.2073	3.06734	59.9502	613606	6136.06	26.4272	553.915	51.1648	159.623	20.9601	0.615796	32.2615	1.61307
D19P18L	965	2.00393e-08	2.00393e-10	0.804654	17.9401	1.35275	33.718	594321	5943.21	23.8643	532.064	40.1196	151.76	22.2954	0.502692	32.8641	1.64321
D19P19A	967	2.64749e-08	2.64749e-10	1.06	22.9436	1.8904	45.4276	582794	5827.94	23.3338	505.058	41.6134	144.756	21.6449	0.54929	33.7868	1.68934
D19P19B	968	1.71991e-08	1.71991e-10	0.762018	16.5023	1.25191	30.3523	566651	5666.51	25.1058	543.691	41.2461	155.798	21.656	0.505754	30.52	1.526
D19P19C	973	2.32847e-08	2.32847e-10	0.961689	21.3054	1.85994	45.4213	512637	5126.37	21.1726	469.061	40.9486	133.952	22.1541	0.581994	32.1204	1.60602
D19P19D	979	2.91366e-08	2.91366e-10	1.2748	28.1637	1.84429	46.9192	620994	6209.94	27.17	600.26	39.3077	171.429	22.0927	0.436563	30.3945	1.51973
D19P19E	987	2.01901e-08	2.01901e-10	0.887132	19.273	1.34807	33.4566	603470	6034.7	26.5159	576.06	40.2932	164.972	21.7251	0.466308	30.6935	1.53468
D19P19F	995	5.40523e-08	5.40523e-10	2.28053	47.267	4.13474	96.8619	558035	5580.35	23.5442	487.983	42.687	140.874	20.7263	0.583176	33.2415	1.66208
D19P20A	1013	4.78975e-10	4.78975e-12	0.0212891	0.409059	0.0431019	1.0691	448016	4480.16	19.9131	382.62	40.316	111.943	19.2145	0.702455	33.586	1.6793
D19P20C	1017	5.28158e-10	5.28158e-12	0.023937	0.508066	0.0477701	1.19927	440400	4404	19.9597	423.647	39.8327	121.834	21.2251	0.626822	30.3383	1.51691
D19P20E	1021	2.32998e-10	2.32998e-12	0.00890145	0.22214	0.0220793	0.586275	397422	3974.22	15.1831	378.9	37.6603	106.307	24.9554	0.662625	31.3905	1.56953
D19P20F	1022	6.76615e-10	6.76615e-12	0.0291857	0.619019	0.0528045	1.56685	431831	4318.31	18.627	395.071	33.701	113.613	21.2096	0.56869	31.8969	1.59485
D19P20H	1039	1.37439e-08	1.37439e-10	0.577884	12.7667	1.1906	32.4706	423272	4232.72	17.7972	393.178	36.667	112.343	22.0921	0.621721	31.6245	1.58123
D19P20J	1056	2.01056e-08	2.01056e-10	0.855164	18.6424	1.4357	35.48	566675	5666.75	24.1027	525.433	40.4651	150.409	21.7997	0.513419	31.6158	1.58079
D19P20K	1065	7.25721e-09	7.25721e-11	0.303763	7.38539	0.578501	16.9478	428209	4282.09	17.9234	435.773	34.1342	122.68	24.313	0.522203	29.2986	1.46493
D19P21A	1068	7.32898e-09	7.32898e-11	0.29591	7.55821	0.725882	21.2411	345037	3450.37	13.931	355.829	34.1734	99.5008	25.5423	0.64026	29.1174	1.45587
D19P21B	1069	3.35875e-08	3.35875e-10	1.4461	29.3925	3.35033	62.8597	534325	5343.25	23.0053	467.59	53.2986	135.493	20.3253	0.759905	33.1027	1.65514
D19P21C	1078	1.554e-08	1.554e-10	0.739688	15.902	1.54612	36.5974	424621	4246.21	20.2115	434.513	42.2468	124.706	21.4983	0.648186	28.5797	1.42899
D19P21D	1079	1.96008e-08	1.96008e-10	0.825043	19.0742	1.56222	39.7253	493408	4934.08	20.7687	480.151	39.3255	136.202	23.119	0.546015	30.4058	1.52029
D19P21E	1082	2.89492e-10	2.89492e-12	0.0121274	0.286167	0.0312015	0.765981	377936	3779.36	15.8325	373.595	40.734	105.699	23.5968	0.726883	30.0232	1.50116
D19P21G	1096	9.98462e-10	9.98462e-12	0.0436746	0.951138	0.0999657	2.56052	389945	3899.45	17.0569	371.463	39.0412	106.403	21.7778	0.700674	30.7646	1.53823
D19P21H	1105	1.23169e-08	1.23169e-10	0.539559	11.3504	1.05861	28.4169	433435	4334.35	18.9873	399.424	37.2528	115.035	21.0364	0.621774	31.6221	1.58111
D19P26A	1483	8.42325e-09	8.42325e-11	0.341168	7.64415	0.734825	21.3452	394620	3946.2	15.9833	358.12	34.4257	102.104	22.4059	0.64086	32.4427	1.62214
D19P26B	1484	8.44207e-09	8.44207e-11	0.36071	8.26628	0.771347	23.1797	364200	3642	15.5614	356.617	33.2768	101.316	22.9167	0.622083	30.1753	1.50877
D19P26D	1486	1.50928e-08	1.50928e-10	0.617146	14.6912	1.18796	37.0423	407447	4074.47	16.6606	396.608	32.0703	112.007	23.8051	0.539077	30.534	1.5267
D19P26E	1487	8.864e-09	8.864e-11	0.384275	8.74101	0.727211	23.0058	385293	3852.93	16.7034	379.947	31.6098	108.049	22.7467	0.554635	29.9292	1.49646
D19P26F	1490	3.9942e-08	3.9942e-10	1.65419	35.8441	2.60883	112.086	356350	3563.5	14.7582	319.79	23.2752	91.6242	21.6686	0.485218	32.6348	1.63174
D19P26G	1492	7.03849e-09	7.03849e-11	0.286105	6.36515	0.596422	17.3197	406385	4063.85	16.519	367.508	34.436	104.893	22.2476	0.624674	32.5201	1.626
D19P26H	1493	3.21714e-08	3.21714e-10	1.34407	29.7764	2.19159	96.4499	333556	3335.56	13.9354	308.724	22.7226	88.1427	22.1539	0.490678	31.7558	1.58779
D19P26K	1496	3.14123e-09	3.14123e-11	0.133317	3.01835	0.271091	7.94766	395240	3952.4	16.7744	379.778	34.1095	108.092	22.6404	0.598761	30.692	1.5346
D19P26L	1501	8.70261e-09	8.70261e-11	0.371406	8.6286	0.839664	23.4837	370581	3705.81	15.8155	367.429	35.7551	104.177	23.2322	0.648744	29.8632	1.49316
D19P26M	1510	6.09393e-09	6.09393e-11	0.245424	5.96527	0.5287	15.8207	385187	3851.87	15.5129	377.055	33.4183	106.173	24.306	0.590865	30.4565	1.52282
D19P26N	1520	2.61711e-08	2.61711e-10	1.0714	23.5904	1.80789	61.2438	427326	4273.26	17.494	385.189	29.5196	110.087	22.0184	0.510912	32.5744	1.62872
D19P26O	1530	1.39032e-08	1.39032e-10	0.60493	13.7763	0.945314	31.9178	435594	4355.94	18.9528	431.62	29.6172	122.69	22.7735	0.457458	29.7931	1.48965
D19P26P	1539	1.41273e-08	1.41273e-10	0.574354	13.558	0.906461	31.2167	452556	4525.56	18.3989	434.319	29.0377	122.781	23.6056	0.44572	30.9321	1.54661
D19P27a	1542	8.36767e-09	8.36767e-11	0.345555	7.833	0.732434	21.0759	397026	3970.26	16.3958	371.657	34.7522	105.767	22.6679	0.623374	31.5099	1.57549
D19P27b	1548	3.46141e-08	3.46141e-10	1.42376	33.0857	2.07855	98.9173	349929	3499.29	14.3934	334.478	21.0131	94.7733	23.2383	0.418822	30.983	1.54915
D19P27c	1549	1.86253e-08	1.86253e-10	0.796351	18.196	1.23097	38.1318	488446	4884.46	20.8842	477.187	32.2819	135.571	22.8492	0.451003	30.2337	1.51168
D19P27d	1557	8.60401e-09	8.60401e-11	0.369087	8.80369	0.811492	22.3944	384204	3842.04	16.4812	393.12	36.2364	111.011	23.8526	0.614509	29.0548	1.45274
D19P27f	1574	2.09742e-08	2.09742e-10	0.863634	19.6278	1.6304	53.2707	393729	3937.29	16.2122	368.454	30.6059	104.794	22.727	0.553773	31.5342	1.57671
D19P27g	1584	5.71114e-09	5.71114e-11	0.235568	5.87366	0.515496	13.9622	409044	4090.44	16.8719	420.684	36.9209	118.021	24.934	0.585094	29.0974	1.45487
D19P27h	1593	9.7004e-09	9.7004e-11	0.396795	9.65581	0.804233	29.4363	329539	3295.39	13.4798	328.024	27.3211	92.3421	24.3345	0.555267	29.957	1.49785
D19P28B	1607	3.85026e-08	3.85026e-10	1.68494	37.1205	3.81806	97.5373	394747	3947.47	17.2748	380.577	39.1446	108.809	22.0308	0.685705	30.4548	1.52274
D19P28C	1608	1.90188e-08	1.90188e-10	0.775902	18.395	1.64213	64.2488	296017	2960.17	12.0765	286.309	25.5589	80.9185	23.7079	0.595134	30.7093	1.53546
D19P28D	1609	2.5657e-08	2.5657e-10	1.10275	24.3309	2.31131	59.4272	431738	4317.38	18.5563	409.423	38.8932	117.012	22.0638	0.6333	30.9704	1.54852
D19P28E	1610	3.88741e-08	3.88741e-10	1.70647	35.1978	3.69006	103.076	377140	3771.4	16.5554	341.474	35.7993	98.6882	20.6261	0.698918	32.0759	1.6038
D19P28F	1636	2.23229e-08	2.23229e-10	0.960757	20.8553	1.80617	53.9181	414015	4140.15	17.8188	386.796	33.4984	110.817	21.7072	0.577366	31.3547	1.56773
D19P28G	1645	1.21115e-08	1.21115e-10	0.510383	11.4535	1.13378	29.4893	410708	4107.08	17.3074	388.394	38.4471	110.714	22.4409	0.659933	31.1408	1.55704
D19P29D	1681	1.51675e-09	1.51675e-11	0.0615737	1.58209	0.120286	3.52445	430352	4303.52	17.4704	448.89	34.129	125.375	25.6942	0.506865	28.8148	1.44074
D19P29E	1690	8.03048e-09	8.03048e-11	0.366104	8.32343	0.662947	16.792	478234	4782.34	21.8023	495.679	39.48	140.963	22.7352	0.530989	28.4734	1.42367
D19P29F	1699	4.41473e-09	4.41473e-11	0.173612	4.1928	0.393124	9.57648	460997	4609.97	18.129	437.823	41.051	123.412	24.1504	0.625077	31.3608	1.56804
D19P30G	1747	3.68541e-09	3.68541e-11	0.160185	3.20776	0.264444	15.8759	232138	2321.38	10.0898	202.052	16.6569	58.6656	20.0254	0.549592	33.2006	1.66003
D19P32B	1810	1.2095e-08	1.2095e-10	0.507771	12.7114	1.00466	31.1214	388638	3886.38	16.3158	408.445	32.2818	114.504	25.0337	0.526906	28.4918	1.42459
D19P32C	1820	1.30568e-08	1.30568e-10	0.517444	13.8681	0.961321	30.6325	426239	4262.39	16.892	452.724	31.3823	125.703	26.8012	0.462126	28.465	1.42325
D19P32D	1825	4.41063e-08	4.41063e-10	1.64126	40.377	2.77534	103.432	426427	4264.27	15.868	390.372	26.8325	109.691	24.6013	0.458237	32.628	1.6314
D19P32E	1837	2.36073e-08	2.36073e-10	1.10299	22.0478	1.75574	-							19.9891	0.530888	30.9321	1.54661
D19P33A	1844	5.98896e-09	5.98896e-11	0.259652	5.43668	0.566315	-							20.9383	0.694437	32.0743	1.60372
D19P33B	1845	7.98679e-10	7.98679e-12	0.0375542	0.754224	0.0818929	-							20.0836	0.72386	30.613	1.53065
D19P33C	1880	1.10791e-09	1.10791e-11	0.0513594	1.0315	0.120233	-							20.084	0.777072	31.0493	1.55247
D19P33D	1888	5.47132e-10	5.47132e-12	0.0253942	0.52502	0.047748	-							20.6748	0.6063	30.2796	1.51398
D19P33E	1899	1.81034e-09	1.81034e-11	0.0832457	1.61647	0.161135	-							19.418	0.664554	32.1854	1.60927
D19P33F	1850	5.03762e-09	5.03762e-11	0.214926	4.47211	0.400782	-							20.8077	0.597454	32.7658	1.63829
D19P33H	1872	7.36045e-09	7.36045e-11	0.333395	6.80683	0.645763	-							20.4167	0.632465	31.3512	1.56756
D19P34A	1910	2.21739e-10	2.21739e-12	0.0122749	0.236119	0.023382	-							19.2359	0.660176	26.9427	1.34714
D19P34B	1912	4.45116e-10	4.45116e-12	0.0203606	0.433697	0.0385946	-							21.3007	0.593266	29.9709	1.49855
D19P34D	1930	2.85041e-09	2.85041e-11	0.12128	2.56456	0.225412	-							21.1459	0.585967	32.4177	1.62089
D19P34E	1938	7.24562e-10	7.24562e-12	0.03298	0.664657	0.0725072	-							20.1533	0.727264	31.5335	1.57668
D19P34F	1946	4.17805e-10	4.17805e-12	0.0162531	0.382393	0.0410486	-							23.5273	0.715645	32.4125	1.62063
D19P34G	1955	3.56437e-10	3.56437e-12	0.0127037	0.310549	0.036403	1.00937	353126	3531.26	12.5857	307.664	36.0649	86.6055	24.4456	0.781477	34.2434	1.71217
D19P34H	1964	6.25938e-10	6.25938e-12	0.0251306	0.582145	0.0580362	1.40304	446130	4461.3	17.9115	414.917	41.3647	117.699	23.1648	0.664625	31.822	1.5911
D19P35C	1975	1.76564e-09	1.76564e-11	0.0719731	1.66356	0.208413	5.0336	350771	3507.71	14.2985	330.491	41.4044	93.8235	23.1137	0.835208	31.3974	1.56987
D19P35D	1984	5.88551e-09	5.88551e-11	0.27978	5.84307	0.638402	15.6952	374988	3749.88	17.8258	372.284	40.675	107.377	20.8845	0.728387	29.3147	1.46573
D19P35E	1993	2.81735e-09	2.81735e-11	0.140527	2.87042	0.300368	8.50991	331067	3310.67	16.5133	337.303	35.2962	97.6426	20.4261	0.697617	28.4582	1.42291
D19P35G	2024	1.00347e-08	1.00347e-10	0.41251	9.272	0.963123	27.2292	368526	3685.26	15.1495	340.516	35.3709	97.0503	22.477	0.692496	31.8788	1.59394
D19P35H	2040	2.45094e-09	2.45094e-11	0.0969005	2.34836	0.259866	5.5787	439339	4393.39	17.3697	420.951	46.5819	118.631	24.2348	0.737724	31.0991	1.55496
D19P36A	2043	5.69835e-09	5.69835e-11	0.2435	5.15193	0.529928	13.6404	417754	4177.54	17.8513	377.695	38.8498	108.692	21.1578	0.685734	32.2612	1.61306
D19P36B	2053	5.00348e-09	5.00348e-11	0.209304	4.53917	0.498095	11.5008	435053	4350.53	18.1991	394.681	43.3094	113.139	21.6869	0.731551	32.2815	1.61408
D19P36C	2054	1.05004e-08	1.05004e-10	0.48709	9.442	0.886294	22.3375	470079	4700.79	21.8059	422.697	39.6774	123.452	19.3845	0.625781	31.9509	1.59755
D19P36D	2072	1.50077e-09	1.50077e-11	0.0622688	1.62661	0.152617	3.96721	378292	3782.92	15.6959	410.013	38.4695	114.291	26.1224	0.625499	27.793	1.38965
D19P36E	2087	1.14443e-08	1.14443e-10	0.525069	10.45	0.976966	25.0622	456635	4566.35	20.9506	416.961	38.9816	121.216	19.9021	0.623265	31.6116	1.58058
D19P36F	2098	3.20055e-09	3.20055e-11	0.12995	3.08498	0.315231	7.3669	434450	4344.5	17.6397	418.762	42.7901	118.357	23.7398	0.681215	30.8194	1.54097
D19P36G	2113	4.28882e-09	4.28882e-11	0.181199	3.94805	0.379423	8.5746	500177	5001.77	21.1321	460.435	44.2497	131.858	21.7885	0.640693	31.8398	1.59199
D19P36H	2121	2.83436e-09	2.83436e-11	0.11834	2.59048	0.315054	6.30223	449739	4497.39	18.7776	411.042	49.9909	117.678	21.8901	0.8108	32.09	1.6045
D19P37B	2138	5.38862e-09	5.38862e-11	0.230969	5.11993	0.577009	12.9253	416905	4169.05	17.8695	396.116	44.6418	113.161	22.1671	0.751325	30.9319	1.54659
D19P37C	2139	5.44851e-09	5.44851e-11	0.229993	4.99215	0.493287	12.5818	433048	4330.48	18.2799	396.776	39.2065	113.702	21.7057	0.65875	31.9691	1.59845
D19P37D	2153	2.7446e-09	2.7446e-11	0.111858	2.61477	0.312891	7.77559	352977	3529.77	14.3858	336.279	40.2401	95.294	23.3758	0.797752	31.1058	1.55529
D19P37E	2164	4.64269e-09	4.64269e-11	0.181832	3.92217	0.420459	-							21.5704	0.71467	34.6356	1.73178
D19P37F	2173	1.63101e-09	1.63101e-11	0.0661138	1.58228	0.187029	-							23.9327	0.788012	30.6567	1.53283
D19P37G	2182	1.97887e-09	1.97887e-11	0.0795108	1.76337	0.186099	-							22.1777	0.703573	32.9848	1.64924
D19P37H	2190	2.60919e-09	2.60919e-11	0.122724	2.40403	0.269737	-							19.589	0.748014	31.2383	1.56192
D19P18B	916	2.06698e-08	2.06698e-10	0.998402	21.1449	1.86531	42.282	488857	4888.57	23.6129	500.094	44.116	143.856	21.1788	0.588104	28.5188	1.42594
D19P18C	925	8.03646e-09	8.03646e-11	0.320143	7.94167	0.734475	22.7519	353222	3532.22	14.0711	349.055	32.2819	98.0057	24.8066	0.616558	30.2594	1.51297
D19P18E	935	3.90882e-08	3.90882e-10	1.91042	39.7736	3.48744	75.7367	516107	5161.07	25.2246	525.157	46.0469	151.492	20.8193	0.584548	28.5893	1.42947
D19P18G	943	3.67858e-08	3.67858e-10	1.58431	33.2073	3.06734	59.9502	613606	6136.06	26.4272	553.915	51.1648	159.623	20.9601	0.615796	32.2615	1.61307
D19P18L	965	2.00393e-08	2.00393e-10	0.804654	17.9401	1.35275	33.718	594321	5943.21	23.8643	532.064	40.1196	151.76	22.2954	0.502692	32.8641	1.64321
D19P19A	967	2.64749e-08	2.64749e-10	1.06	22.9436	1.8904	45.4276	582794	5827.94	23.3338	505.058	41.6134	144.756	21.6449	0.54929	33.7868	1.68934
D19P19B	968	1.71991e-08	1.71991e-10	0.762018	16.5023	1.25191	30.3523	566651	5666.51	25.1058	543.691	41.2461	155.798	21.656	0.505754	30.52	1.526
D19P19C	973	2.32847e-08	2.32847e-10	0.961689	21.3054	1.85994	45.4213	512637	5126.37	21.1726	469.061	40.9486	133.952	22.1541	0.581994	32.1204	1.60602
D19P19D	979	2.91366e-08	2.91366e-10	1.2748	28.1637	1.84429	46.9192	620994	6209.94	27.17	600.26	39.3077	171.429	22.0927	0.436563	30.3945	1.51973
D19P19E	987	2.01901e-08	2.01901e-10	0.887132	19.273	1.34807	33.4566	603470	6034.7	26.5159	576.06	40.2932	164.972	21.7251	0.466308	30.6935	1.53468
D19P19F	995	5.40523e-08	5.40523e-10	2.28053	47.267	4.13474	96.8619	558035	5580.35	23.5442	487.983	42.687	140.874	20.7263	0.583176	33.2415	1.66208
D19P20A	1013	4.78975e-10	4.78975e-12	0.0212891	0.409059	0.0431019	1.0691	448016	4480.16	19.9131	382.62	40.316	111.943	19.2145	0.702455	33.586	1.6793
D19P20C	1017	5.28158e-10	5.28158e-12	0.023937	0.508066	0.0477701	1.19927	440400	4404	19.9597	423.647	39.8327	121.834	21.2251	0.626822	30.3383	1.51691
D19P20E	1021	2.32998e-10	2.32998e-12	0.00890145	0.22214	0.0220793	0.586275	397422	3974.22	15.1831	378.9	37.6603	106.307	24.9554	0.662625	31.3905	1.56953
D19P20F	1022	6.76615e-10	6.76615e-12	0.0291857	0.619019	0.0528045	1.56685	431831	4318.31	18.627	395.071	33.701	113.613	21.2096	0.56869	31.8969	1.59485
D19P20H	1039	1.37439e-08	1.37439e-10	0.577884	12.7667	1.1906	32.4706	423272	4232.72	17.7972	393.178	36.667	112.343	22.0921	0.621721	31.6245	1.58123
D19P20J	1056	2.01056e-08	2.01056e-10	0.855164	18.6424	1.4357	35.48	566675	5666.75	24.1027	525.433	40.4651	150.409	21.7997	0.513419	31.6158	1.58079
D19P20K	1065	7.25721e-09	7.25721e-11	0.303763	7.38539	0.578501	16.9478	428209	4282.09	17.9234	435.773	34.1342	122.68	24.313	0.522203	29.2986	1.46493
D19P21A	1068	7.32898e-09	7.32898e-11	0.29591	7.55821	0.725882	21.2411	345037	3450.37	13.931	355.829	34.1734	99.5008	25.5423	0.64026	29.1174	1.45587
D19P21B	1069	3.35875e-08	3.35875e-10	1.4461	29.3925	3.35033	62.8597	534325	5343.25	23.0053	467.59	53.2986	135.493	20.3253	0.759905	33.1027	1.65514
D19P21C	1078	1.554e-08	1.554e-10	0.739688	15.902	1.54612	36.5974	424621	4246.21	20.2115	434.513	42.2468	124.706	21.4983	0.648186	28.5797	1.42899
D19P21D	1079	1.96008e-08	1.96008e-10	0.825043	19.0742	1.56222	39.7253	493408	4934.08	20.7687	480.151	39.3255	136.202	23.119	0.546015	30.4058	1.52029
D19P21E	1082	2.89492e-10	2.89492e-12	0.0121274	0.286167	0.0312015	0.765981	377936	3779.36	15.8325	373.595	40.734	105.699	23.5968	0.726883	30.0232	1.50116
D19P21G	1096	9.98462e-10	9.98462e-12	0.0436746	0.951138	0.0999657	2.56052	389945	3899.45	17.0569	371.463	39.0412	106.403	21.7778	0.700674	30.7646	1.53823
D19P21H	1105	1.23169e-08	1.23169e-10	0.539559	11.3504	1.05861	28.4169	433435	4334.35	18.9873	399.424	37.2528	115.035	21.0364	0.621774	31.6221	1.58111
D19P26A	1483	8.42325e-09	8.42325e-11	0.341168	7.64415	0.734825	21.3452	394620	3946.2	15.9833	358.12	34.4257	102.104	22.4059	0.64086	32.4427	1.62214
D19P26B	1484	8.44207e-09	8.44207e-11	0.36071	8.26628	0.771347	23.1797	364200	3642	15.5614	356.617	33.2768	101.316	22.9167	0.622083	30.1753	1.50877
D19P26D	1486	1.50928e-08	1.50928e-10	0.617146	14.6912	1.18796	37.0423	407447	4074.47	16.6606	396.608	32.0703	112.007	23.8051	0.539077	30.534	1.5267
D19P26E	1487	8.864e-09	8.864e-11	0.384275	8.74101	0.727211	23.0058	385293	3852.93	16.7034	379.947	31.6098	108.049	22.7467	0.554635	29.9292	1.49646
D19P26F	1490	3.9942e-08	3.9942e-10	1.65419	35.8441	2.60883	112.086	356350	3563.5	14.7582	319.79	23.2752	91.6242	21.6686	0.485218	32.6348	1.63174
D19P26G	1492	7.03849e-09	7.03849e-11	0.286105	6.36515	0.596422	17.3197	406385	4063.85	16.519	367.508	34.436	104.893	22.2476	0.624674	32.5201	1.626
D19P26H	1493	3.21714e-08	3.21714e-10	1.34407	29.7764	2.19159	96.4499	333556	3335.56	13.9354	308.724	22.7226	88.1427	22.1539	0.490678	31.7558	1.58779
D19P26K	1496	3.14123e-09	3.14123e-11	0.133317	3.01835	0.271091	7.94766	395240	3952.4	16.7744	379.778	34.1095	108.092	22.6404	0.598761	30.692	1.5346
D19P26L	1501	8.70261e-09	8.70261e-11	0.371406	8.6286	0.839664	23.4837	370581	3705.81	15.8155	367.429	35.7551	104.177	23.2322	0.648744	29.8632	1.49316
D19P26M	1510	6.09393e-09	6.09393e-11	0.245424	5.96527	0.5287	15.8207	385187	3851.87	15.5129	377.055	33.4183	106.173	24.306	0.590865	30.4565	1.52282
D19P26N	1520	2.61711e-08	2.61711e-10	1.0714	23.5904	1.80789	61.2438	427326	4273.26	17.494	385.189	29.5196	110.087	22.0184	0.510912	32.5744	1.62872
D19P26O	1530	1.39032e-08	1.39032e-10	0.60493	13.7763	0.945314	31.9178	435594	4355.94	18.9528	431.62	29.6172	122.69	22.7735	0.457458	29.7931	1.48965
D19P26P	1539	1.41273e-08	1.41273e-10	0.574354	13.558	0.906461	31.2167	452556	4525.56	18.3989	434.319	29.0377	122.781	23.6056	0.44572	30.9321	1.54661
D19P27a	1542	8.36767e-09	8.36767e-11	0.345555	7.833	0.732434	21.0759	397026	3970.26	16.3958	371.657	34.7522	105.767	22.6679	0.623374	31.5099	1.57549
D19P27b	1548	3.46141e-08	3.46141e-10	1.42376	33.0857	2.07855	98.9173	349929	3499.29	14.3934	334.478	21.0131	94.7733	23.2383	0.418822	30.983	1.54915
D19P27c	1549	1.86253e-08	1.86253e-10	0.796351	18.196	1.23097	38.1318	488446	4884.46	20.8842	477.187	32.2819	135.571	22.8492	0.451003	30.2337	1.51168
D19P27d	1557	8.60401e-09	8.60401e-11	0.369087	8.80369	0.811492	22.3944	384204	3842.04	16.4812	393.12	36.2364	111.011	23.8526	0.614509	29.0548	1.45274
D19P27f	1574	2.09742e-08	2.09742e-10	0.863634	19.6278	1.6304	53.2707	393729	3937.29	16.2122	368.454	30.6059	104.794	22.727	0.553773	31.5342	1.57671
D19P27g	1584	5.71114e-09	5.71114e-11	0.235568	5.87366	0.515496	13.9622	409044	4090.44	16.8719	420.684	36.9209	118.021	24.934	0.585094	29.0974	1.45487
D19P27h	1593	9.7004e-09	9.7004e-11	0.396795	9.65581	0.804233	29.4363	329539	3295.39	13.4798	328.024	27.3211	92.3421	24.3345	0.555267	29.957	1.49785
D19P28B	1607	3.85026e-08	3.85026e-10	1.68494	37.1205	3.81806	97.5373	394747	3947.47	17.2748	380.577	39.1446	108.809	22.0308	0.685705	30.4548	1.52274
D19P28C	1608	1.90188e-08	1.90188e-10	0.775902	18.395	1.64213	64.2488	296017	2960.17	12.0765	286.309	25.5589	80.9185	23.7079	0.595134	30.7093	1.53546
D19P28D	1609	2.5657e-08	2.5657e-10	1.10275	24.3309	2.31131	59.4272	431738	4317.38	18.5563	409.423	38.8932	117.012	22.0638	0.6333	30.9704	1.54852
D19P28E	1610	3.88741e-08	3.88741e-10	1.70647	35.1978	3.69006	103.076	377140	3771.4	16.5554	341.474	35.7993	98.6882	20.6261	0.698918	32.0759	1.6038
D19P28F	1636	2.23229e-08	2.23229e-10	0.960757	20.8553	1.80617	53.9181	414015	4140.15	17.8188	386.796	33.4984	110.817	21.7072	0.577366	31.3547	1.56773
D19P28G	1645	1.21115e-08	1.21115e-10	0.510383	11.4535	1.13378	29.4893	410708	4107.08	17.3074	388.394	38.4471	110.714	22.4409	0.659933	31.1408	1.55704
D19P29D	1681	1.51675e-09	1.51675e-11	0.0615737	1.58209	0.120286	3.52445	430352	4303.52	17.4704	448.89	34.129	125.375	25.6942	0.506865	28.8148	1.44074
D19P29E	1690	8.03048e-09	8.03048e-11	0.366104	8.32343	0.662947	16.792	478234	4782.34	21.8023	495.679	39.48	140.963	22.7352	0.530989	28.4734	1.42367
D19P29F	1699	4.41473e-09	4.41473e-11	0.173612	4.1928	0.393124	9.57648	460997	4609.97	18.129	437.823	41.051	123.412	24.1504	0.625077	31.3608	1.56804
D19P30G	1747	3.68541e-09	3.68541e-11	0.160185	3.20776	0.264444	15.8759	232138	2321.38	10.0898	202.052	16.6569	58.6656	20.0254	0.549592	33.2006	1.66003
D19P32B	1810	1.2095e-08	1.2095e-10	0.507771	12.7114	1.00466	31.1214	388638	3886.38	16.3158	408.445	32.2818	114.504	25.0337	0.526906	28.4918	1.42459
D19P32C	1820	1.30568e-08	1.30568e-10	0.517444	13.8681	0.961321	30.6325	426239	4262.39	16.892	452.724	31.3823	125.703	26.8012	0.462126	28.465	1.42325
D19P32D	1825	4.41063e-08	4.41063e-10	1.64126	40.377	2.77534	103.432	426427	4264.27	15.868	390.372	26.8325	109.691	24.6013	0.458237	32.628	1.6314
D19P34G	1955	3.56437e-10	3.56437e-12	0.0127037	0.310549	0.036403	1.00937	353126	3531.26	12.5857	307.664	36.0649	86.6055	24.4456	0.781477	34.2434	1.71217
D19P34H	1964	6.25938e-10	6.25938e-12	0.0251306	0.582145	0.0580362	1.40304	446130	4461.3	17.9115	414.917	41.3647	117.699	23.1648	0.664625	31.822	1.5911
D19P35C	1975	1.76564e-09	1.76564e-11	0.0719731	1.66356	0.208413	5.0336	350771	3507.71	14.2985	330.491	41.4044	93.8235	23.1137	0.835208	31.3974	1.56987
D19P35D	1984	5.88551e-09	5.88551e-11	0.27978	5.84307	0.638402	15.6952	374988	3749.88	17.8258	372.284	40.675	107.377	20.8845	0.728387	29.3147	1.46573
D19P35E	1993	2.81735e-09	2.81735e-11	0.140527	2.87042	0.300368	8.50991	331067	3310.67	16.5133	337.303	35.2962	97.6426	20.4261	0.697617	28.4582	1.42291
D19P35G	2024	1.00347e-08	1.00347e-10	0.41251	9.272	0.963123	27.2292	368526	3685.26	15.1495	340.516	35.3709	97.0503	22.477	0.692496	31.8788	1.59394
D19P35H	2040	2.45094e-09	2.45094e-11	0.0969005	2.34836	0.259866	5.5787	439339	4393.39	17.3697	420.951	46.5819	118.631	24.2348	0.737724	31.0991	1.55496
D19P36A	2043	5.69835e-09	5.69835e-11	0.2435	5.15193	0.529928	13.6404	417754	4177.54	17.8513	377.695	38.8498	108.692	21.1578	0.685734	32.2612	1.61306
D19P36B	2053	5.00348e-09	5.00348e-11	0.209304	4.53917	0.498095	11.5008	435053	4350.53	18.1991	394.681	43.3094	113.139	21.6869	0.731551	32.2815	1.61408
D19P36C	2054	1.05004e-08	1.05004e-10	0.48709	9.442	0.886294	22.3375	470079	4700.79	21.8059	422.697	39.6774	123.452	19.3845	0.625781	31.9509	1.59755
D19P36D	2072	1.50077e-09	1.50077e-11	0.0622688	1.62661	0.152617	3.96721	378292	3782.92	15.6959	410.013	38.4695	114.291	26.1224	0.625499	27.793	1.38965
D19P36E	2087	1.14443e-08	1.14443e-10	0.525069	10.45	0.976966	25.0622	456635	4566.35	20.9506	416.961	38.9816	121.216	19.9021	0.623265	31.6116	1.58058
D19P36F	2098	3.20055e-09	3.20055e-11	0.12995	3.08498	0.315231	7.3669	434450	4344.5	17.6397	418.762	42.7901	118.357	23.7398	0.681215	30.8194	1.54097
D19P36G	2113	4.28882e-09	4.28882e-11	0.181199	3.94805	0.379423	8.5746	500177	5001.77	21.1321	460.435	44.2497	131.858	21.7885	0.640693	31.8398	1.59199
D19P36H	2121	2.83436e-09	2.83436e-11	0.11834	2.59048	0.315054	6.30223	449739	4497.39	18.7776	411.042	49.9909	117.678	21.8901	0.8108	32.09	1.6045
D19P37B	2138	5.38862e-09	5.38862e-11	0.230969	5.11993	0.577009	12.9253	416905	4169.05	17.8695	396.116	44.6418	113.161	22.1671	0.751325	30.9319	1.54659
D19P37C	2139	5.44851e-09	5.44851e-11	0.229993	4.99215	0.493287	12.5818	433048	4330.48	18.2799	396.776	39.2065	113.702	21.7057	0.65875	31.9691	1.59845
D19P37D	2153	2.7446e-09	2.7446e-11	0.111858	2.61477	0.312891	7.77559	352977	3529.77	14.3858	336.279	40.2401	95.294	23.3758	0.797752	31.1058	1.55529

## Sheet: Feuil2
	N°pipette 3He	4He sample	± s	238U-ech	232Th-ech	147Sm-ech	Weigths Ca	4He	± s	238U (99,8%)	232Th (100%)	147Sm (15%)	eU	Th/U	Sm/Th	Age corrigé	± s
		(ccSTP)	(ccSTP)	(ng)	(ng)	(ng)	(µg)	(nccSTP/g)	(nccSTP/g)	(ppm)	(ppm)	(ppm)	(ppm)			(Ma)	(Ma)
D19P5B	295	1.9684e-09	1.9684e-11	0.0877994	1.80536	0.1853	-							20.5623	0.684261	31.6489	2.53191
D19P5C	304	2.07586e-09	2.07586e-11	0.100264	2.03672	0.208091	-							20.3136	0.681131	29.5235	2.36188
D19P5E	349	1.08312e-09	1.08312e-11	0.0495541	1.03507	0.10669	-							20.8878	0.687162	30.4557	2.43646
D19P5F	311	1.74973e-09	1.74973e-11	0.0710343	1.55255	0.179401	-							21.8564	0.770348	33.0464	2.64371
D19P5H	326	2.32506e-09	2.32506e-11	0.107283	2.33432	0.268612	-							21.7586	0.767138	29.1847	2.33477
D19P6A	353	2.46023e-09	2.46023e-11	0.103545	2.26606	0.262279	-							21.8848	0.771614	31.8415	2.54732
D19P6B	363	1.44814e-09	1.44814e-11	0.0584069	1.29527	0.149761	-							22.1766	0.770809	32.8601	2.6288
D19P6C	369	2.29766e-09	2.29766e-11	0.11148	2.42169	0.25129	-							21.7231	0.691778	27.7943	2.22354
D19P6D	374	1.94789e-09	1.94789e-11	0.0834557	1.83031	0.205503	-							21.9315	0.748518	31.2239	2.49791
D19P6E	380	5.06555e-09	5.06555e-11	0.217523	4.89199	0.511278	-							22.4896	0.696755	30.5034	2.44027
D19P6F	388	2.35111e-09	2.35111e-11	0.0979843	2.17866	0.24632	-							22.2348	0.753735	31.7312	2.5385
D19P6G	394	2.16704e-09	2.16704e-11	0.0909552	1.99203	0.238367	-							21.9012	0.797735	31.9084	2.55267
D19P7A	400	2.35434e-09	2.35434e-11	0.105729	2.23188	0.221234	-							21.1094	0.660831	30.7568	2.46054
D19P7B	401	4.6971e-09	4.6971e-11	0.200091	4.58365	0.42658	-							22.9078	0.620437	30.2766	2.42212
D19P7C	408	6.27654e-09	6.27654e-11	0.266527	5.95377	0.56245	-							22.3383	0.629798	31.0234	2.48187
D19P7D	409	6.89466e-09	6.89466e-11	0.293298	6.39604	0.684185	-							21.8073	0.713134	31.5978	2.52782
D19P7E	417	5.45176e-09	5.45176e-11	0.233571	5.14598	0.545435	-							22.0317	0.706616	31.1061	2.48849
D19P7H	426	4.22551e-09	4.22551e-11	0.191448	4.20179	0.321547	-							21.9474	0.510174	29.5127	2.36101
D19P7J	444	2.17006e-09	2.17006e-11	0.0966762	1.99227	0.216806	-							20.6076	0.725492	31.6288	2.53031
D19P8A	455	3.80437e-09	3.80437e-11	0.177194	3.84451	0.387285	-							21.6967	0.671581	28.9834	2.31867
D19P8C	465	2.42992e-09	2.42992e-11	0.107886	2.32343	0.229482	-							21.5361	0.658457	30.5945	2.44756
D19P8D	466	1.39131e-09	1.39131e-11	0.0631559	1.26327	0.150731	-							20.0024	0.795454	31.8153	2.54522
D19P8E	474	8.70508e-10	8.70508e-12	0.0382492	0.774685	0.0886267	-							20.2536	0.76269	32.5316	2.60253
D19P8F	475	1.84365e-09	1.84365e-11	0.0821573	1.63531	0.194166	-							19.9046	0.791558	32.5398	2.60318
D19P8G	479	1.69598e-09	1.69598e-11	0.0735147	1.53171	0.148339	-							20.8355	0.645635	32.2133	2.57706
D19P8H	480	1.01421e-09	1.01421e-11	0.0461401	0.893261	0.108932	-							19.3598	0.812994	32.6091	2.60873
D19P8I	488	1.87277e-09	1.87277e-11	0.0870549	1.68234	0.200035	-							19.325	0.792689	31.9616	2.55693
D19P9A	491	1.76141e-09	1.76141e-11	0.0850342	1.57242	0.168434	-							18.4916	0.714117	31.9055	2.55244
D19P9B	492	1.36579e-09	1.36579e-11	0.0607454	1.20673	0.137842	-							19.8653	0.761518	32.6563	2.6125
D19P9C	503	8.64349e-10	8.64349e-12	0.03844	0.78415	0.0739644	-							20.3993	0.628829	31.9537	2.5563
D19P9D	504	4.94403e-10	4.94403e-12	0.0216692	0.460086	0.0554587	-							21.2323	0.803599	31.3591	2.50873
D19P9E	507	3.49496e-10	3.49496e-12	0.0226316	0.333106	0.0303184	-							14.7186	0.606781	28.5232	2.28185
D19P9F	508	1.30588e-09	1.30588e-11	0.0635269	1.16494	0.117041	-							18.3377	0.669798	31.8793	2.55034
D19P9G	513	1.03843e-09	1.03843e-11	0.0534578	0.934214	0.0947485	-							17.4757	0.676137	31.321	2.50568
D19P9I	528	5.3814e-10	5.3814e-12	0.0241414	0.498559	0.0526984	-							20.6516	0.704677	31.3547	2.50838
D19P9J	529	7.29328e-10	7.29328e-12	0.0360117	0.676008	0.0825837	-							18.7719	0.814425	30.8125	2.465
NON	539	2.91417e-09	2.91417e-11	0.14216	2.7813	0.27975	-							19.5646	0.670549	30.1518	2.41215
NON	547	8.18562e-10	8.18562e-12	0.040682	0.773741	0.0706351	-							19.0192	0.608602	30.2907	2.42326
NON	548	8.43607e-10	8.43607e-12	0.0381865	0.745744	0.0752303	-							19.529	0.67253	32.5429	2.60343
NON	558	4.98268e-10	4.98268e-12	0.0262861	0.443569	0.0468335	-							16.8747	0.703888	31.4335	2.51468
NON	573	8.98524e-10	8.98524e-12	0.0482509	0.801228	0.0892073	-							16.6055	0.742254	31.2784	2.50227
NON	580	1.4016e-09	1.4016e-11	0.0643856	1.36978	0.139439	-							21.2747	0.678642	29.8725	2.3898
NON	730	3.25149e-09	3.25149e-11	0.158833	3.07254	0.325484	-							19.3445	0.70622	30.3909	2.43127
NON	738	3.17103e-09	3.17103e-11	0.146943	2.8423	0.299749	-							19.3429	0.703066	32.0393	2.56315
NON	739	1.78113e-09	1.78113e-11	0.0815043	1.5805	0.164044	-							19.3916	0.691949	32.3782	2.59025
NON	747	2.64666e-09	2.64666e-11	0.123894	2.45357	0.239799	-							19.8037	0.651565	31.109	2.48872
NON	748	2.00074e-09	2.00074e-11	0.0905008	1.98554	0.188309	-							21.9395	0.632267	29.5676	2.36541
NON	756	2.6759e-09	2.6759e-11	0.13529	2.60919	0.295676	-							19.286	0.755473	29.4355	2.35484
NON	757	2.02374e-09	2.02374e-11	0.0969452	1.82925	0.197524	-							18.8689	0.719871	31.6283	2.53026
NON	765	1.42925e-09	1.42925e-11	0.0659761	1.26829	0.148873	-							19.2235	0.782539	32.3249	2.58599
NON	766	4.17763e-09	4.17763e-11	0.186921	3.85318	0.34616	-							20.614	0.598917	31.4868	2.51895
NON	773	2.63403e-09	2.63403e-11	0.130217	2.37621	0.23138	-							18.2481	0.649157	31.4955	2.51964
NON	774	1.97801e-09	1.97801e-11	0.0877529	1.71054	0.193564	-							19.4926	0.754398	33.2533	2.66026
NON	612	1.83897e-09	1.83897e-11	0.0916445	1.71911	0.167684	-							18.7585	0.650274	30.5504	2.44403
NON	643	6.00193e-09	6.00193e-11	0.290325	5.69614	0.468226	-							19.6199	0.548003	30.3395	2.42716
NON	652	3.50616e-09	3.50616e-11	0.168409	3.357	0.292571	-							19.9336	0.581017	30.1568	2.41255
NON	673	6.30445e-09	6.30445e-11	0.303562	5.81134	0.457874	-							19.1438	0.525265	31.1002	2.48801
NON	680	1.08073e-09	1.08073e-11	0.0479312	0.999285	0.109611	-							20.8483	0.731261	31.4661	2.51729
NON	690	1.66232e-09	1.66232e-11	0.076954	1.54543	0.142702	-							20.0825	0.61559	31.0974	2.48779
NON	699	1.11388e-09	1.11388e-11	0.050467	1.00976	0.105576	-							20.0083	0.69704	31.8695	2.54956
NON	708	1.4141e-09	1.4141e-11	0.0634203	1.26509	0.13042	-							19.9477	0.687277	32.2766	2.58213
NON	717	1.2426e-09	1.2426e-11	0.0566168	1.13529	0.11692	-							20.0522	0.686576	31.6335	2.53068
NON	726	2.62353e-09	2.62353e-11	0.149577	2.70733	0.289719	-							18.0999	0.71342	27.4898	2.19918
NON	835	1.4598e-09	1.4598e-11	0.0669871	1.29724	0.113244	-							19.3655	0.581976	32.3259	2.58607
NON	843	2.92538e-09	2.92538e-11	0.140896	2.7506	0.232978	-							19.5223	0.564672	30.5959	2.44767
NON	844	1.39289e-09	1.39289e-11	0.0669746	1.32952	0.131241	-							19.8512	0.658084	30.2265	2.41812
NON	853	2.32429e-09	2.32429e-11	0.113555	2.20527	0.226508	-							19.4203	0.684748	30.2899	2.42319
NON	862	4.23279e-09	4.23279e-11	0.208207	3.95886	0.322404	-							19.0141	0.542923	30.6131	2.44905
NON	863	5.98157e-09	5.98157e-11	0.2864	5.44756	0.513024	-							19.0208	0.627834	31.4389	2.51512
NON	872	4.84229e-09	4.84229e-11	0.230354	4.4171	0.3588	-							19.1753	0.541532	31.4362	2.5149
NON	874	2.35214e-08	2.35214e-10	1.0617	21.209	1.52309	-							19.9765	0.478757	32.0361	2.56289
D19P18B	916	2.06698e-08	2.06698e-10	0.998402	21.1449	1.86531	42.282	488857	4888.57	23.6129	500.094	44.116	143.856	21.1788	0.588104	28.5188	2.2815
D19P18C	925	8.03646e-09	8.03646e-11	0.320143	7.94167	0.734475	22.7519	353222	3532.22	14.0711	349.055	32.2819	98.0057	24.8066	0.616558	30.2594	2.42075
D19P18E	935	3.90882e-08	3.90882e-10	1.91042	39.7736	3.48744	75.7367	516107	5161.07	25.2246	525.157	46.0469	151.492	20.8193	0.584548	28.5893	2.28715
D19P18G	943	3.67858e-08	3.67858e-10	1.58431	33.2073	3.06734	59.9502	613606	6136.06	26.4272	553.915	51.1648	159.623	20.9601	0.615796	32.2615	2.58092
D19P18L	965	2.00393e-08	2.00393e-10	0.804654	17.9401	1.35275	33.718	594321	5943.21	23.8643	532.064	40.1196	151.76	22.2954	0.502692	32.8641	2.62913
D19P19A	967	2.64749e-08	2.64749e-10	1.06	22.9436	1.8904	45.4276	582794	5827.94	23.3338	505.058	41.6134	144.756	21.6449	0.54929	33.7868	2.70294
D19P19B	968	1.71991e-08	1.71991e-10	0.762018	16.5023	1.25191	30.3523	566651	5666.51	25.1058	543.691	41.2461	155.798	21.656	0.505754	30.52	2.4416
D19P19C	973	2.32847e-08	2.32847e-10	0.961689	21.3054	1.85994	45.4213	512637	5126.37	21.1726	469.061	40.9486	133.952	22.1541	0.581994	32.1204	2.56963
D19P19D	979	2.91366e-08	2.91366e-10	1.2748	28.1637	1.84429	46.9192	620994	6209.94	27.17	600.26	39.3077	171.429	22.0927	0.436563	30.3945	2.43156
D19P19E	987	2.01901e-08	2.01901e-10	0.887132	19.273	1.34807	33.4566	603470	6034.7	26.5159	576.06	40.2932	164.972	21.7251	0.466308	30.6935	2.45548
D19P19F	995	5.40523e-08	5.40523e-10	2.28053	47.267	4.13474	96.8619	558035	5580.35	23.5442	487.983	42.687	140.874	20.7263	0.583176	33.2415	2.65932
D19P20A	1013	4.78975e-10	4.78975e-12	0.0212891	0.409059	0.0431019	1.0691	448016	4480.16	19.9131	382.62	40.316	111.943	19.2145	0.702455	33.586	2.68688
D19P20C	1017	5.28158e-10	5.28158e-12	0.023937	0.508066	0.0477701	1.19927	440400	4404	19.9597	423.647	39.8327	121.834	21.2251	0.626822	30.3383	2.42706
D19P20E	1021	2.32998e-10	2.32998e-12	0.00890145	0.22214	0.0220793	0.586275	397422	3974.22	15.1831	378.9	37.6603	106.307	24.9554	0.662625	31.3905	2.51124
D19P20F	1022	6.76615e-10	6.76615e-12	0.0291857	0.619019	0.0528045	1.56685	431831	4318.31	18.627	395.071	33.701	113.613	21.2096	0.56869	31.8969	2.55175
D19P20H	1039	1.37439e-08	1.37439e-10	0.577884	12.7667	1.1906	32.4706	423272	4232.72	17.7972	393.178	36.667	112.343	22.0921	0.621721	31.6245	2.52996
D19P20J	1056	2.01056e-08	2.01056e-10	0.855164	18.6424	1.4357	35.48	566675	5666.75	24.1027	525.433	40.4651	150.409	21.7997	0.513419	31.6158	2.52926
D19P20K	1065	7.25721e-09	7.25721e-11	0.303763	7.38539	0.578501	16.9478	428209	4282.09	17.9234	435.773	34.1342	122.68	24.313	0.522203	29.2986	2.34389
D19P21A	1068	7.32898e-09	7.32898e-11	0.29591	7.55821	0.725882	21.2411	345037	3450.37	13.931	355.829	34.1734	99.5008	25.5423	0.64026	29.1174	2.32939
D19P21B	1069	3.35875e-08	3.35875e-10	1.4461	29.3925	3.35033	62.8597	534325	5343.25	23.0053	467.59	53.2986	135.493	20.3253	0.759905	33.1027	2.64822
D19P21C	1078	1.554e-08	1.554e-10	0.739688	15.902	1.54612	36.5974	424621	4246.21	20.2115	434.513	42.2468	124.706	21.4983	0.648186	28.5797	2.28638
D19P21D	1079	1.96008e-08	1.96008e-10	0.825043	19.0742	1.56222	39.7253	493408	4934.08	20.7687	480.151	39.3255	136.202	23.119	0.546015	30.4058	2.43246
D19P21E	1082	2.89492e-10	2.89492e-12	0.0121274	0.286167	0.0312015	0.765981	377936	3779.36	15.8325	373.595	40.734	105.699	23.5968	0.726883	30.0232	2.40185
D19P21G	1096	9.98462e-10	9.98462e-12	0.0436746	0.951138	0.0999657	2.56052	389945	3899.45	17.0569	371.463	39.0412	106.403	21.7778	0.700674	30.7646	2.46117
D19P21H	1105	1.23169e-08	1.23169e-10	0.539559	11.3504	1.05861	28.4169	433435	4334.35	18.9873	399.424	37.2528	115.035	21.0364	0.621774	31.6221	2.52977
D19P26A	1483	8.42325e-09	8.42325e-11	0.341168	7.64415	0.734825	21.3452	394620	3946.2	15.9833	358.12	34.4257	102.104	22.4059	0.64086	32.4427	2.59542
D19P26B	1484	8.44207e-09	8.44207e-11	0.36071	8.26628	0.771347	23.1797	364200	3642	15.5614	356.617	33.2768	101.316	22.9167	0.622083	30.1753	2.41403
D19P26D	1486	1.50928e-08	1.50928e-10	0.617146	14.6912	1.18796	37.0423	407447	4074.47	16.6606	396.608	32.0703	112.007	23.8051	0.539077	30.534	2.44272
D19P26E	1487	8.864e-09	8.864e-11	0.384275	8.74101	0.727211	23.0058	385293	3852.93	16.7034	379.947	31.6098	108.049	22.7467	0.554635	29.9292	2.39434
D19P26F	1490	3.9942e-08	3.9942e-10	1.65419	35.8441	2.60883	112.086	356350	3563.5	14.7582	319.79	23.2752	91.6242	21.6686	0.485218	32.6348	2.61078
D19P26G	1492	7.03849e-09	7.03849e-11	0.286105	6.36515	0.596422	17.3197	406385	4063.85	16.519	367.508	34.436	104.893	22.2476	0.624674	32.5201	2.6016
D19P26H	1493	3.21714e-08	3.21714e-10	1.34407	29.7764	2.19159	96.4499	333556	3335.56	13.9354	308.724	22.7226	88.1427	22.1539	0.490678	31.7558	2.54047
D19P26K	1496	3.14123e-09	3.14123e-11	0.133317	3.01835	0.271091	7.94766	395240	3952.4	16.7744	379.778	34.1095	108.092	22.6404	0.598761	30.692	2.45536
D19P26L	1501	8.70261e-09	8.70261e-11	0.371406	8.6286	0.839664	23.4837	370581	3705.81	15.8155	367.429	35.7551	104.177	23.2322	0.648744	29.8632	2.38906
D19P26M	1510	6.09393e-09	6.09393e-11	0.245424	5.96527	0.5287	15.8207	385187	3851.87	15.5129	377.055	33.4183	106.173	24.306	0.590865	30.4565	2.43652
D19P26N	1520	2.61711e-08	2.61711e-10	1.0714	23.5904	1.80789	61.2438	427326	4273.26	17.494	385.189	29.5196	110.087	22.0184	0.510912	32.5744	2.60595
D19P26O	1530	1.39032e-08	1.39032e-10	0.60493	13.7763	0.945314	31.9178	435594	4355.94	18.9528	431.62	29.6172	122.69	22.7735	0.457458	29.7931	2.38345
D19P26P	1539	1.41273e-08	1.41273e-10	0.574354	13.558	0.906461	31.2167	452556	4525.56	18.3989	434.319	29.0377	122.781	23.6056	0.44572	30.9321	2.47457
D19P27a	1542	8.36767e-09	8.36767e-11	0.345555	7.833	0.732434	21.0759	397026	3970.26	16.3958	371.657	34.7522	105.767	22.6679	0.623374	31.5099	2.52079
D19P27b	1548	3.46141e-08	3.46141e-10	1.42376	33.0857	2.07855	98.9173	349929	3499.29	14.3934	334.478	21.0131	94.7733	23.2383	0.418822	30.983	2.47864
D19P27c	1549	1.86253e-08	1.86253e-10	0.796351	18.196	1.23097	38.1318	488446	4884.46	20.8842	477.187	32.2819	135.571	22.8492	0.451003	30.2337	2.41869
D19P27d	1557	8.60401e-09	8.60401e-11	0.369087	8.80369	0.811492	22.3944	384204	3842.04	16.4812	393.12	36.2364	111.011	23.8526	0.614509	29.0548	2.32438
D19P27f	1574	2.09742e-08	2.09742e-10	0.863634	19.6278	1.6304	53.2707	393729	3937.29	16.2122	368.454	30.6059	104.794	22.727	0.553773	31.5342	2.52274
D19P27g	1584	5.71114e-09	5.71114e-11	0.235568	5.87366	0.515496	13.9622	409044	4090.44	16.8719	420.684	36.9209	118.021	24.934	0.585094	29.0974	2.32779
D19P27h	1593	9.7004e-09	9.7004e-11	0.396795	9.65581	0.804233	29.4363	329539	3295.39	13.4798	328.024	27.3211	92.3421	24.3345	0.555267	29.957	2.39656
D19P28B	1607	3.85026e-08	3.85026e-10	1.68494	37.1205	3.81806	97.5373	394747	3947.47	17.2748	380.577	39.1446	108.809	22.0308	0.685705	30.4548	2.43638
D19P28C	1608	1.90188e-08	1.90188e-10	0.775902	18.395	1.64213	64.2488	296017	2960.17	12.0765	286.309	25.5589	80.9185	23.7079	0.595134	30.7093	2.45674
D19P28D	1609	2.5657e-08	2.5657e-10	1.10275	24.3309	2.31131	59.4272	431738	4317.38	18.5563	409.423	38.8932	117.012	22.0638	0.6333	30.9704	2.47764
D19P28E	1610	3.88741e-08	3.88741e-10	1.70647	35.1978	3.69006	103.076	377140	3771.4	16.5554	341.474	35.7993	98.6882	20.6261	0.698918	32.0759	2.56607
D19P28F	1636	2.23229e-08	2.23229e-10	0.960757	20.8553	1.80617	53.9181	414015	4140.15	17.8188	386.796	33.4984	110.817	21.7072	0.577366	31.3547	2.50837
D19P28G	1645	1.21115e-08	1.21115e-10	0.510383	11.4535	1.13378	29.4893	410708	4107.08	17.3074	388.394	38.4471	110.714	22.4409	0.659933	31.1408	2.49126
D19P29D	1681	1.51675e-09	1.51675e-11	0.0615737	1.58209	0.120286	3.52445	430352	4303.52	17.4704	448.89	34.129	125.375	25.6942	0.506865	28.8148	2.30519
D19P29E	1690	8.03048e-09	8.03048e-11	0.366104	8.32343	0.662947	16.792	478234	4782.34	21.8023	495.679	39.48	140.963	22.7352	0.530989	28.4734	2.27787
D19P29F	1699	4.41473e-09	4.41473e-11	0.173612	4.1928	0.393124	9.57648	460997	4609.97	18.129	437.823	41.051	123.412	24.1504	0.625077	31.3608	2.50886
D19P30G	1747	3.68541e-09	3.68541e-11	0.160185	3.20776	0.264444	15.8759	232138	2321.38	10.0898	202.052	16.6569	58.6656	20.0254	0.549592	33.2006	2.65605
D19P32B	1810	1.2095e-08	1.2095e-10	0.507771	12.7114	1.00466	31.1214	388638	3886.38	16.3158	408.445	32.2818	114.504	25.0337	0.526906	28.4918	2.27934
D19P32C	1820	1.30568e-08	1.30568e-10	0.517444	13.8681	0.961321	30.6325	426239	4262.39	16.892	452.724	31.3823	125.703	26.8012	0.462126	28.465	2.2772
D19P32D	1825	4.41063e-08	4.41063e-10	1.64126	40.377	2.77534	103.432	426427	4264.27	15.868	390.372	26.8325	109.691	24.6013	0.458237	32.628	2.61024
D19P32E	1837	2.36073e-08	2.36073e-10	1.10299	22.0478	1.75574	-							19.9891	0.530888	30.9321	2.47457
D19P33A	1844	5.98896e-09	5.98896e-11	0.259652	5.43668	0.566315	-							20.9383	0.694437	32.0743	2.56595
D19P33B	1845	7.98679e-10	7.98679e-12	0.0375542	0.754224	0.0818929	-							20.0836	0.72386	30.613	2.44904
D19P33C	1880	1.10791e-09	1.10791e-11	0.0513594	1.0315	0.120233	-							20.084	0.777072	31.0493	2.48395
D19P33D	1888	5.47132e-10	5.47132e-12	0.0253942	0.52502	0.047748	-							20.6748	0.6063	30.2796	2.42237
D19P33E	1899	1.81034e-09	1.81034e-11	0.0832457	1.61647	0.161135	-							19.418	0.664554	32.1854	2.57483
D19P33F	1850	5.03762e-09	5.03762e-11	0.214926	4.47211	0.400782	-							20.8077	0.597454	32.7658	2.62127
D19P33H	1872	7.36045e-09	7.36045e-11	0.333395	6.80683	0.645763	-							20.4167	0.632465	31.3512	2.50809
D19P34A	1910	2.21739e-10	2.21739e-12	0.0122749	0.236119	0.023382	-							19.2359	0.660176	26.9427	2.15542
D19P34B	1912	4.45116e-10	4.45116e-12	0.0203606	0.433697	0.0385946	-							21.3007	0.593266	29.9709	2.39767
D19P34D	1930	2.85041e-09	2.85041e-11	0.12128	2.56456	0.225412	-							21.1459	0.585967	32.4177	2.59342
D19P34E	1938	7.24562e-10	7.24562e-12	0.03298	0.664657	0.0725072	-							20.1533	0.727264	31.5335	2.52268
D19P34F	1946	4.17805e-10	4.17805e-12	0.0162531	0.382393	0.0410486	-							23.5273	0.715645	32.4125	2.593
D19P34G	1955	3.56437e-10	3.56437e-12	0.0127037	0.310549	0.036403	1.00937	353126	3531.26	12.5857	307.664	36.0649	86.6055	24.4456	0.781477	34.2434	2.73948
D19P34H	1964	6.25938e-10	6.25938e-12	0.0251306	0.582145	0.0580362	1.40304	446130	4461.3	17.9115	414.917	41.3647	117.699	23.1648	0.664625	31.822	2.54576
D19P35C	1975	1.76564e-09	1.76564e-11	0.0719731	1.66356	0.208413	5.0336	350771	3507.71	14.2985	330.491	41.4044	93.8235	23.1137	0.835208	31.3974	2.51179
D19P35D	1984	5.88551e-09	5.88551e-11	0.27978	5.84307	0.638402	15.6952	374988	3749.88	17.8258	372.284	40.675	107.377	20.8845	0.728387	29.3147	2.34517
D19P35E	1993	2.81735e-09	2.81735e-11	0.140527	2.87042	0.300368	8.50991	331067	3310.67	16.5133	337.303	35.2962	97.6426	20.4261	0.697617	28.4582	2.27665
D19P35G	2024	1.00347e-08	1.00347e-10	0.41251	9.272	0.963123	27.2292	368526	3685.26	15.1495	340.516	35.3709	97.0503	22.477	0.692496	31.8788	2.5503
D19P35H	2040	2.45094e-09	2.45094e-11	0.0969005	2.34836	0.259866	5.5787	439339	4393.39	17.3697	420.951	46.5819	118.631	24.2348	0.737724	31.0991	2.48793
D19P36A	2043	5.69835e-09	5.69835e-11	0.2435	5.15193	0.529928	13.6404	417754	4177.54	17.8513	377.695	38.8498	108.692	21.1578	0.685734	32.2612	2.58089
D19P36B	2053	5.00348e-09	5.00348e-11	0.209304	4.53917	0.498095	11.5008	435053	4350.53	18.1991	394.681	43.3094	113.139	21.6869	0.731551	32.2815	2.58252
D19P36C	2054	1.05004e-08	1.05004e-10	0.48709	9.442	0.886294	22.3375	470079	4700.79	21.8059	422.697	39.6774	123.452	19.3845	0.625781	31.9509	2.55607
D19P36D	2072	1.50077e-09	1.50077e-11	0.0622688	1.62661	0.152617	3.96721	378292	3782.92	15.6959	410.013	38.4695	114.291	26.1224	0.625499	27.793	2.22344
D19P36E	2087	1.14443e-08	1.14443e-10	0.525069	10.45	0.976966	25.0622	456635	4566.35	20.9506	416.961	38.9816	121.216	19.9021	0.623265	31.6116	2.52893
D19P36F	2098	3.20055e-09	3.20055e-11	0.12995	3.08498	0.315231	7.3669	434450	4344.5	17.6397	418.762	42.7901	118.357	23.7398	0.681215	30.8194	2.46555
D19P36G	2113	4.28882e-09	4.28882e-11	0.181199	3.94805	0.379423	8.5746	500177	5001.77	21.1321	460.435	44.2497	131.858	21.7885	0.640693	31.8398	2.54718
D19P36H	2121	2.83436e-09	2.83436e-11	0.11834	2.59048	0.315054	6.30223	449739	4497.39	18.7776	411.042	49.9909	117.678	21.8901	0.8108	32.09	2.5672
D19P37B	2138	5.38862e-09	5.38862e-11	0.230969	5.11993	0.577009	12.9253	416905	4169.05	17.8695	396.116	44.6418	113.161	22.1671	0.751325	30.9319	2.47455
D19P37C	2139	5.44851e-09	5.44851e-11	0.229993	4.99215	0.493287	12.5818	433048	4330.48	18.2799	396.776	39.2065	113.702	21.7057	0.65875	31.9691	2.55753
D19P37D	2153	2.7446e-09	2.7446e-11	0.111858	2.61477	0.312891	7.77559	352977	3529.77	14.3858	336.279	40.2401	95.294	23.3758	0.797752	31.1058	2.48847
D19P37E	2164	4.64269e-09	4.64269e-11	0.181832	3.92217	0.420459	-							21.5704	0.71467	34.6356	2.77085
D19P37F	2173	1.63101e-09	1.63101e-11	0.0661138	1.58228	0.187029	-							23.9327	0.788012	30.6567	2.45253
D19P37G	2182	1.97887e-09	1.97887e-11	0.0795108	1.76337	0.186099	-							22.1777	0.703573	32.9848	2.63878
D19P37H	2190	2.60919e-09	2.60919e-11	0.122724	2.40403	0.269737	-							19.589	0.748014	31.2383	2.49906
D19P18B	916	2.06698e-08	2.06698e-10	0.998402	21.1449	1.86531	42.282	488857	4888.57	23.6129	500.094	44.116	143.856	21.1788	0.588104	28.5188	2.2815
D19P18C	925	8.03646e-09	8.03646e-11	0.320143	7.94167	0.734475	22.7519	353222	3532.22	14.0711	349.055	32.2819	98.0057	24.8066	0.616558	30.2594	2.42075
D19P18E	935	3.90882e-08	3.90882e-10	1.91042	39.7736	3.48744	75.7367	516107	5161.07	25.2246	525.157	46.0469	151.492	20.8193	0.584548	28.5893	2.28715
D19P18G	943	3.67858e-08	3.67858e-10	1.58431	33.2073	3.06734	59.9502	613606	6136.06	26.4272	553.915	51.1648	159.623	20.9601	0.615796	32.2615	2.58092
D19P18L	965	2.00393e-08	2.00393e-10	0.804654	17.9401	1.35275	33.718	594321	5943.21	23.8643	532.064	40.1196	151.76	22.2954	0.502692	32.8641	2.62913
D19P19A	967	2.64749e-08	2.64749e-10	1.06	22.9436	1.8904	45.4276	582794	5827.94	23.3338	505.058	41.6134	144.756	21.6449	0.54929	33.7868	2.70294
D19P19B	968	1.71991e-08	1.71991e-10	0.762018	16.5023	1.25191	30.3523	566651	5666.51	25.1058	543.691	41.2461	155.798	21.656	0.505754	30.52	2.4416
D19P19C	973	2.32847e-08	2.32847e-10	0.961689	21.3054	1.85994	45.4213	512637	5126.37	21.1726	469.061	40.9486	133.952	22.1541	0.581994	32.1204	2.56963
D19P19D	979	2.91366e-08	2.91366e-10	1.2748	28.1637	1.84429	46.9192	620994	6209.94	27.17	600.26	39.3077	171.429	22.0927	0.436563	30.3945	2.43156
D19P19E	987	2.01901e-08	2.01901e-10	0.887132	19.273	1.34807	33.4566	603470	6034.7	26.5159	576.06	40.2932	164.972	21.7251	0.466308	30.6935	2.45548
D19P19F	995	5.40523e-08	5.40523e-10	2.28053	47.267	4.13474	96.8619	558035	5580.35	23.5442	487.983	42.687	140.874	20.7263	0.583176	33.2415	2.65932
D19P20A	1013	4.78975e-10	4.78975e-12	0.0212891	0.409059	0.0431019	1.0691	448016	4480.16	19.9131	382.62	40.316	111.943	19.2145	0.702455	33.586	2.68688
D19P20C	1017	5.28158e-10	5.28158e-12	0.023937	0.508066	0.0477701	1.19927	440400	4404	19.9597	423.647	39.8327	121.834	21.2251	0.626822	30.3383	2.42706
D19P20E	1021	2.32998e-10	2.32998e-12	0.00890145	0.22214	0.0220793	0.586275	397422	3974.22	15.1831	378.9	37.6603	106.307	24.9554	0.662625	31.3905	2.51124
D19P20F	1022	6.76615e-10	6.76615e-12	0.0291857	0.619019	0.0528045	1.56685	431831	4318.31	18.627	395.071	33.701	113.613	21.2096	0.56869	31.8969	2.55175
D19P20H	1039	1.37439e-08	1.37439e-10	0.577884	12.7667	1.1906	32.4706	423272	4232.72	17.7972	393.178	36.667	112.343	22.0921	0.621721	31.6245	2.52996
D19P20J	1056	2.01056e-08	2.01056e-10	0.855164	18.6424	1.4357	35.48	566675	5666.75	24.1027	525.433	40.4651	150.409	21.7997	0.513419	31.6158	2.52926
D19P20K	1065	7.25721e-09	7.25721e-11	0.303763	7.38539	0.578501	16.9478	428209	4282.09	17.9234	435.773	34.1342	122.68	24.313	0.522203	29.2986	2.34389
D19P21A	1068	7.32898e-09	7.32898e-11	0.29591	7.55821	0.725882	21.2411	345037	3450.37	13.931	355.829	34.1734	99.5008	25.5423	0.64026	29.1174	2.32939
D19P21B	1069	3.35875e-08	3.35875e-10	1.4461	29.3925	3.35033	62.8597	534325	5343.25	23.0053	467.59	53.2986	135.493	20.3253	0.759905	33.1027	2.64822
D19P21C	1078	1.554e-08	1.554e-10	0.739688	15.902	1.54612	36.5974	424621	4246.21	20.2115	434.513	42.2468	124.706	21.4983	0.648186	28.5797	2.28638
D19P21D	1079	1.96008e-08	1.96008e-10	0.825043	19.0742	1.56222	39.7253	493408	4934.08	20.7687	480.151	39.3255	136.202	23.119	0.546015	30.4058	2.43246
D19P21E	1082	2.89492e-10	2.89492e-12	0.0121274	0.286167	0.0312015	0.765981	377936	3779.36	15.8325	373.595	40.734	105.699	23.5968	0.726883	30.0232	2.40185
D19P21G	1096	9.98462e-10	9.98462e-12	0.0436746	0.951138	0.0999657	2.56052	389945	3899.45	17.0569	371.463	39.0412	106.403	21.7778	0.700674	30.7646	2.46117
D19P21H	1105	1.23169e-08	1.23169e-10	0.539559	11.3504	1.05861	28.4169	433435	4334.35	18.9873	399.424	37.2528	115.035	21.0364	0.621774	31.6221	2.52977
D19P26A	1483	8.42325e-09	8.42325e-11	0.341168	7.64415	0.734825	21.3452	394620	3946.2	15.9833	358.12	34.4257	102.104	22.4059	0.64086	32.4427	2.59542
D19P26B	1484	8.44207e-09	8.44207e-11	0.36071	8.26628	0.771347	23.1797	364200	3642	15.5614	356.617	33.2768	101.316	22.9167	0.622083	30.1753	2.41403
D19P26D	1486	1.50928e-08	1.50928e-10	0.617146	14.6912	1.18796	37.0423	407447	4074.47	16.6606	396.608	32.0703	112.007	23.8051	0.539077	30.534	2.44272
D19P26E	1487	8.864e-09	8.864e-11	0.384275	8.74101	0.727211	23.0058	385293	3852.93	16.7034	379.947	31.6098	108.049	22.7467	0.554635	29.9292	2.39434
D19P26F	1490	3.9942e-08	3.9942e-10	1.65419	35.8441	2.60883	112.086	356350	3563.5	14.7582	319.79	23.2752	91.6242	21.6686	0.485218	32.6348	2.61078
D19P26G	1492	7.03849e-09	7.03849e-11	0.286105	6.36515	0.596422	17.3197	406385	4063.85	16.519	367.508	34.436	104.893	22.2476	0.624674	32.5201	2.6016
D19P26H	1493	3.21714e-08	3.21714e-10	1.34407	29.7764	2.19159	96.4499	333556	3335.56	13.9354	308.724	22.7226	88.1427	22.1539	0.490678	31.7558	2.54047
D19P26K	1496	3.14123e-09	3.14123e-11	0.133317	3.01835	0.271091	7.94766	395240	3952.4	16.7744	379.778	34.1095	108.092	22.6404	0.598761	30.692	2.45536
D19P26L	1501	8.70261e-09	8.70261e-11	0.371406	8.6286	0.839664	23.4837	370581	3705.81	15.8155	367.429	35.7551	104.177	23.2322	0.648744	29.8632	2.38906
D19P26M	1510	6.09393e-09	6.09393e-11	0.245424	5.96527	0.5287	15.8207	385187	3851.87	15.5129	377.055	33.4183	106.173	24.306	0.590865	30.4565	2.43652
D19P26N	1520	2.61711e-08	2.61711e-10	1.0714	23.5904	1.80789	61.2438	427326	4273.26	17.494	385.189	29.5196	110.087	22.0184	0.510912	32.5744	2.60595
D19P26O	1530	1.39032e-08	1.39032e-10	0.60493	13.7763	0.945314	31.9178	435594	4355.94	18.9528	431.62	29.6172	122.69	22.7735	0.457458	29.7931	2.38345
D19P26P	1539	1.41273e-08	1.41273e-10	0.574354	13.558	0.906461	31.2167	452556	4525.56	18.3989	434.319	29.0377	122.781	23.6056	0.44572	30.9321	2.47457
D19P27a	1542	8.36767e-09	8.36767e-11	0.345555	7.833	0.732434	21.0759	397026	3970.26	16.3958	371.657	34.7522	105.767	22.6679	0.623374	31.5099	2.52079
D19P27b	1548	3.46141e-08	3.46141e-10	1.42376	33.0857	2.07855	98.9173	349929	3499.29	14.3934	334.478	21.0131	94.7733	23.2383	0.418822	30.983	2.47864
D19P27c	1549	1.86253e-08	1.86253e-10	0.796351	18.196	1.23097	38.1318	488446	4884.46	20.8842	477.187	32.2819	135.571	22.8492	0.451003	30.2337	2.41869
D19P27d	1557	8.60401e-09	8.60401e-11	0.369087	8.80369	0.811492	22.3944	384204	3842.04	16.4812	393.12	36.2364	111.011	23.8526	0.614509	29.0548	2.32438
D19P27f	1574	2.09742e-08	2.09742e-10	0.863634	19.6278	1.6304	53.2707	393729	3937.29	16.2122	368.454	30.6059	104.794	22.727	0.553773	31.5342	2.52274
D19P27g	1584	5.71114e-09	5.71114e-11	0.235568	5.87366	0.515496	13.9622	409044	4090.44	16.8719	420.684	36.9209	118.021	24.934	0.585094	29.0974	2.32779
D19P27h	1593	9.7004e-09	9.7004e-11	0.396795	9.65581	0.804233	29.4363	329539	3295.39	13.4798	328.024	27.3211	92.3421	24.3345	0.555267	29.957	2.39656
D19P28B	1607	3.85026e-08	3.85026e-10	1.68494	37.1205	3.81806	97.5373	394747	3947.47	17.2748	380.577	39.1446	108.809	22.0308	0.685705	30.4548	2.43638
D19P28C	1608	1.90188e-08	1.90188e-10	0.775902	18.395	1.64213	64.2488	296017	2960.17	12.0765	286.309	25.5589	80.9185	23.7079	0.595134	30.7093	2.45674
D19P28D	1609	2.5657e-08	2.5657e-10	1.10275	24.3309	2.31131	59.4272	431738	4317.38	18.5563	409.423	38.8932	117.012	22.0638	0.6333	30.9704	2.47764
D19P28E	1610	3.88741e-08	3.88741e-10	1.70647	35.1978	3.69006	103.076	377140	3771.4	16.5554	341.474	35.7993	98.6882	20.6261	0.698918	32.0759	2.56607
D19P28F	1636	2.23229e-08	2.23229e-10	0.960757	20.8553	1.80617	53.9181	414015	4140.15	17.8188	386.796	33.4984	110.817	21.7072	0.577366	31.3547	2.50837
D19P28G	1645	1.21115e-08	1.21115e-10	0.510383	11.4535	1.13378	29.4893	410708	4107.08	17.3074	388.394	38.4471	110.714	22.4409	0.659933	31.1408	2.49126
D19P29D	1681	1.51675e-09	1.51675e-11	0.0615737	1.58209	0.120286	3.52445	430352	4303.52	17.4704	448.89	34.129	125.375	25.6942	0.506865	28.8148	2.30519
D19P29E	1690	8.03048e-09	8.03048e-11	0.366104	8.32343	0.662947	16.792	478234	4782.34	21.8023	495.679	39.48	140.963	22.7352	0.530989	28.4734	2.27787
D19P29F	1699	4.41473e-09	4.41473e-11	0.173612	4.1928	0.393124	9.57648	460997	4609.97	18.129	437.823	41.051	123.412	24.1504	0.625077	31.3608	2.50886
D19P30G	1747	3.68541e-09	3.68541e-11	0.160185	3.20776	0.264444	15.8759	232138	2321.38	10.0898	202.052	16.6569	58.6656	20.0254	0.549592	33.2006	2.65605
D19P32B	1810	1.2095e-08	1.2095e-10	0.507771	12.7114	1.00466	31.1214	388638	3886.38	16.3158	408.445	32.2818	114.504	25.0337	0.526906	28.4918	2.27934
D19P32C	1820	1.30568e-08	1.30568e-10	0.517444	13.8681	0.961321	30.6325	426239	4262.39	16.892	452.724	31.3823	125.703	26.8012	0.462126	28.465	2.2772
D19P32D	1825	4.41063e-08	4.41063e-10	1.64126	40.377	2.77534	103.432	426427	4264.27	15.868	390.372	26.8325	109.691	24.6013	0.458237	32.628	2.61024
D19P34G	1955	3.56437e-10	3.56437e-12	0.0127037	0.310549	0.036403	1.00937	353126	3531.26	12.5857	307.664	36.0649	86.6055	24.4456	0.781477	34.2434	2.73948
D19P34H	1964	6.25938e-10	6.25938e-12	0.0251306	0.582145	0.0580362	1.40304	446130	4461.3	17.9115	414.917	41.3647	117.699	23.1648	0.664625	31.822	2.54576
D19P35C	1975	1.76564e-09	1.76564e-11	0.0719731	1.66356	0.208413	5.0336	350771	3507.71	14.2985	330.491	41.4044	93.8235	23.1137	0.835208	31.3974	2.51179
D19P35D	1984	5.88551e-09	5.88551e-11	0.27978	5.84307	0.638402	15.6952	374988	3749.88	17.8258	372.284	40.675	107.377	20.8845	0.728387	29.3147	2.34517
D19P35E	1993	2.81735e-09	2.81735e-11	0.140527	2.87042	0.300368	8.50991	331067	3310.67	16.5133	337.303	35.2962	97.6426	20.4261	0.697617	28.4582	2.27665
D19P35G	2024	1.00347e-08	1.00347e-10	0.41251	9.272	0.963123	27.2292	368526	3685.26	15.1495	340.516	35.3709	97.0503	22.477	0.692496	31.8788	2.5503
D19P35H	2040	2.45094e-09	2.45094e-11	0.0969005	2.34836	0.259866	5.5787	439339	4393.39	17.3697	420.951	46.5819	118.631	24.2348	0.737724	31.0991	2.48793
D19P36A	2043	5.69835e-09	5.69835e-11	0.2435	5.15193	0.529928	13.6404	417754	4177.54	17.8513	377.695	38.8498	108.692	21.1578	0.685734	32.2612	2.58089
D19P36B	2053	5.00348e-09	5.00348e-11	0.209304	4.53917	0.498095	11.5008	435053	4350.53	18.1991	394.681	43.3094	113.139	21.6869	0.731551	32.2815	2.58252
D19P36C	2054	1.05004e-08	1.05004e-10	0.48709	9.442	0.886294	22.3375	470079	4700.79	21.8059	422.697	39.6774	123.452	19.3845	0.625781	31.9509	2.55607
D19P36D	2072	1.50077e-09	1.50077e-11	0.0622688	1.62661	0.152617	3.96721	378292	3782.92	15.6959	410.013	38.4695	114.291	26.1224	0.625499	27.793	2.22344
D19P36E	2087	1.14443e-08	1.14443e-10	0.525069	10.45	0.976966	25.0622	456635	4566.35	20.9506	416.961	38.9816	121.216	19.9021	0.623265	31.6116	2.52893
D19P36F	2098	3.20055e-09	3.20055e-11	0.12995	3.08498	0.315231	7.3669	434450	4344.5	17.6397	418.762	42.7901	118.357	23.7398	0.681215	30.8194	2.46555
D19P36G	2113	4.28882e-09	4.28882e-11	0.181199	3.94805	0.379423	8.5746	500177	5001.77	21.1321	460.435	44.2497	131.858	21.7885	0.640693	31.8398	2.54718
D19P36H	2121	2.83436e-09	2.83436e-11	0.11834	2.59048	0.315054	6.30223	449739	4497.39	18.7776	411.042	49.9909	117.678	21.8901	0.8108	32.09	2.5672
D19P37B	2138	5.38862e-09	5.38862e-11	0.230969	5.11993	0.577009	12.9253	416905	4169.05	17.8695	396.116	44.6418	113.161	22.1671	0.751325	30.9319	2.47455
D19P37C	2139	5.44851e-09	5.44851e-11	0.229993	4.99215	0.493287	12.5818	433048	4330.48	18.2799	396.776	39.2065	113.702	21.7057	0.65875	31.9691	2.55753
D19P37D	2153	2.7446e-09	2.7446e-11	0.111858	2.61477	0.312891	7.77559	352977	3529.77	14.3858	336.279	40.2401	95.294	23.3758	0.797752	31.1058	2.48847
