# Supplementary material for: Technical note: apatite and zircon (U-Th)/He analysis usingquadrupole and magnetic sector mass spectrometry
Source: Copernicus journal article supplement (doi:10.5194/gchron-2021-1), 2021-01-25
Supplement: Supplementary file 2 [file TableS2_FCT_VG_He_line.xlsx]

## Sheet: Feuil1
ID	Name	4He sample	± s	U	Th	FT	Rs	weight	4He	± s	238U	232Th	eU	Th/U	Age	Age cc	± s
		(ccSTP)	(ccSTP)	(ng)	(ng)		(mg)	(microg)	(nccSTP/g)	(nccSTP/g)	(ppm)	(ppm)	(ppm)		(Ma)	(Ma)	(Ma)
VG line																										3
42607	FCT FA-31	3.55762e-09	3.718e-11	1.47864	0.543466	0.765	48.4	3.68	966745	9667.45	401.804	147.681	437.247	0.367545	18.3015	23.9235	0.191265									3
42607	FCT FA-30	3.55388e-09	3.256e-11	1.47347	0.488271	0.765	48.4	3.68	965728	9657.28	400.4	132.682	432.244	0.331374	18.4916	24.172	0.169416
42648	FCT FA-32	4.77191e-09	3.85e-11	1.61545	0.707774	0.791	54.6	5.32	896976	8969.76	303.656	133.04	335.585	0.438129	22.1299	27.9772	0.178545
42648	FCT FA-33	3.77718e-09	2.827e-11	1.2905	0.57408	0.737	42.7	2.51	1.50485e+06	15048.5	514.144	228.717	569.036	0.44485	21.8961	29.7097	0.163879
42650	FCT FA-34	1.09778e-08	5.676e-11	3.22122	1.88355	0.839	63.4	9.59	1.14471e+06	11447.1	335.894	196.408	383.032	0.584732	24.7551	29.5055	0.127995
42651	FCT FA-35	1.09138e-08	5.456e-11	3.7884	1.77341	0.809	60.1	12.61	865485	8654.85	300.429	140.635	334.181	0.468115	21.4448	26.5078	0.107207
42651	FCT FA-36	3.58358e-09	3.531e-11	1.17629	0.667462	0.782	52.4	4.37	820041	8200.41	269.174	152.737	305.831	0.567429	22.2093	28.4006	0.218834
He-line
5417	FCT-FA7	1.07991e-08	1.07991e-10	3.28072	1.50915	0.791	54.7	8.64	1.2499e+06	12499	379.713	174.67	421.634	0.460006	24.5456	31.0311	0.245456
5422	FCT-FA9	5.41685e-09	5.41685e-11	1.52981	0.581341	0.766	48.5	4.58	1.18272e+06	11827.2	334.019	126.93	364.483	0.380009	26.8611	35.0667	0.268611
5433	FCT-FA12	1.56201e-08	1.56201e-10	4.80891	2.0932	0.878	95.2	36.91	423194	4231.94	130.288	56.711	143.898	0.435276	24.3491	27.7324	0.243491
5467	FCT-FA19	5.40922e-09	5.40922e-11	1.903	0.526169	0.779	51.4	5.2	1.04023e+06	10402.3	365.962	101.186	390.247	0.276494	22.0576	28.3152	0.220576
5475	FCT-FA20	6.62686e-09	6.62686e-11	2.24303	0.891326	0.798	56.4	6.86	966014	9660.14	326.973	129.931	358.156	0.397375	22.3283	27.9803	0.223283
5479	FCT-FA21	3.35453e-09	3.35453e-11	1.14107	0.47268	0.786	53.3	5.58	601170	6011.7	204.493	84.7096	224.823	0.414242	22.1373	28.1645	0.221373
5482	FCT-FA22	5.95729e-09	5.95729e-11	2.00894	0.987082	0.784	52.2	6.62	899893	8998.93	303.465	149.106	339.25	0.491345	21.9658	28.0176	0.219658
5491	FCT-FA25	4.50902e-09	4.50902e-11	1.67989	0.706145	0.77	49	4.2	1.07358e+06	10735.8	399.974	168.13	440.325	0.420351	20.1854	26.2147	0.201854
5496	FCT-FA26	6.20139e-09	6.20139e-11	2.21424	0.853089	0.774	50.1	4.63	1.33939e+06	13393.9	478.238	184.252	522.459	0.385273	21.2218	27.4184	0.212218
583	FCT-FA37	5.3018e-08	5.3018e-10	23.3605	8.13326	0.889	105.7	44.95	1.17949e+06	11794.9	519.699	180.94	563.125	0.348163	17.3365	19.5011	0.173365
587	FCT-FA39	2.33139e-08	2.33139e-10	7.41814	4.37936	0.854	79.3	17.68	1.31866e+06	13186.6	419.578	247.701	479.026	0.590358	22.8026	26.7009	0.228026
589	FCT-FA40	1.03415e-08	1.03415e-10	3.27836	3.35238	0.799	56.7	7.07	1.46273e+06	14627.3	463.699	474.169	577.5	1.02258	21.0064	26.2908	0.210064
593	FCT-FA43	2.60793e-09	2.60793e-11	0.969508	0.415549	0.757	43.3	4.14	629934	6299.34	234.181	100.374	258.271	0.428618	20.1934	26.6755	0.201934
595	FCT-FA44	3.49191e-09	3.49191e-11	1.27946	0.800119	0.777	51.1	4.83	722964	7229.64	264.899	165.656	304.656	0.625356	19.6591	25.3013	0.196591
597	FCT-FA45	8.57949e-09	8.57949e-11	2.9611	2.10771	0.824	65.8	9.31	921535	9215.35	318.056	226.392	372.39	0.711799	20.5061	24.886	0.205061
599	FCT-FA46	1.80584e-08	1.80584e-10	5.07527	3.94117	0.877	95.1	36.64	492860	4928.6	138.517	107.565	164.333	0.776543	24.857	28.3432	0.24857
601	FCT-FA47	6.13624e-09	6.13624e-11	2.1774	0.962788	0.807	59.7	6.77	906388	9063.88	321.625	142.214	355.756	0.442173	21.0945	26.1394	0.210945
608	FCT-FA49	1.76e-08	1.76e-10	5.99013	4.02107	0.873	92	28.47	618195	6181.95	210.401	141.239	244.299	0.671283	20.9663	24.0164	0.209663
614	FCT-FA50	6.30778e-09	6.30778e-11	2.42202	1.18212	0.757	46.7	3.75	1.68208e+06	16820.8	645.871	315.233	721.527	0.488074	19.3048	25.5017	0.193048
631	FCT-FA52	3.82917e-09	3.82917e-11	1.56458	0.549109	0.747	44.6	3.36	1.13963e+06	11396.3	465.65	163.425	504.872	0.350962	18.6836	25.0115	0.186836
642	FCT-FA53	1.0489e-08	1.0489e-10	4.07854	2.04993	0.747	44.6	3.36	3.12173e+06	31217.3	1213.85	610.099	1360.27	0.502615	19.0048	25.4414	0.190048
2225	FCT-RP-L	1.49163e-08	1.49163e-10	4.81506	5.06593	0.8	1	1	1.49163e+07	149163	4815.06	5065.93	6030.88	1.0521	20.514	25.6425	0.20514
2240	FTC-RP2	5.90134e-09	5.90134e-11	2.02562	1.07262	0.83	59.9	7.74	762447	7624.47	261.708	138.581	294.967	0.529525	21.4075	25.7921	0.214075
2254	FCT-RP-4	5.96036e-09	5.96036e-11	1.73809	1.04105	0.74	43.6	3.33	1.7899e+06	17899	521.948	312.627	596.979	0.598962	24.8366	33.563	0.248366
2277	FCT-RP-6	4.75994e-09	4.75994e-11	1.5886	0.656312	0.806	51.7	5.04	944432	9444.32	315.199	130.221	346.452	0.413138	22.5681	28.0001	0.225681
2289	FCT-RP7	4.08493e-09	4.08493e-11	1.41494	0.631223	0.866	73.8	13.58	300805	3008.05	104.193	46.4818	115.348	0.446113	21.5917	24.9327	0.215917
2295	FCT-RP-8	6.29511e-09	6.29511e-11	1.79684	1.95601	0.825	56.9	6.32	996062	9960.62	284.31	309.495	358.589	1.08858	23.0409	27.9284	0.230409
2319	FCT-RP-9	7.92818e-09	7.92818e-11	2.93177	3.08931	0.774	43.5	2.84	2.79161e+06	27916.1	1032.31	1087.79	1293.38	1.05374	17.902	23.1292	0.17902
2328	FCT-RP-10	5.1988e-09	5.1988e-11	1.76122	0.730187	0.765	43.9	3.75	1.38635e+06	13863.5	469.658	194.717	516.39	0.414592	22.2261	29.0537	0.222261
2344	FCT-RP12	1.02404e-08	1.02404e-10	3.35964	1.54932	0.811	61.3	8.45	1.21188e+06	12118.8	397.59	183.352	441.595	0.461157	22.7232	28.0188	0.227232
2356	FCT-RP13	1.2589e-08	1.2589e-10	4.46975	2.99182	0.824	60.6	11.19	1.12502e+06	11250.2	399.442	267.366	463.61	0.669349	20.1059	24.4004	0.201059
2698	FCT-FA-54	7.71017e-09	7.71017e-11	2.81211	1.18845	0.826	66.2	7.4	1.04191e+06	10419.1	380.014	160.601	418.558	0.422618	20.609	24.9503	0.20609
2708	FCT-FA-55	5.3744e-09	5.3744e-11	2.14964	1.12426	0.795	55.8	6.15	873886	8738.86	349.534	182.806	393.408	0.523	18.3964	23.1401	0.183964
2732	FCT-FA56	4.21414e-09	4.21414e-11	1.62904	0.665161	0.758	46.8	3.48	1.21096e+06	12109.6	468.116	191.138	513.989	0.408314	19.5046	25.7316	0.195046
3309	FCT-FA54B	9.93074e-09	9.93074e-11	3.63889	1.74777	0.827	66.2	11.85	838037	8380.37	307.08	147.492	342.478	0.480304	20.2625	24.5012	0.202625
3321	FCT-FA55B	5.27362e-09	5.27362e-11	1.93042	0.88697	0.799	56.8	8.77	601325	6013.25	220.116	101.137	244.389	0.45947	20.3732	25.4984	0.203732
3494	FCT-FA56B	3.71234e-09	3.71234e-11	1.33764	0.276805	0.811	60.2	8.1	458314	4583.14	165.14	34.1735	173.342	0.206936	21.8734	26.9709	0.218734
3506	FCT-FA57	1.95337e-08	1.95337e-10	6.57163	4.07639	0.866	86.6	26.95	724811	7248.11	243.845	151.258	280.147	0.620302	21.4333	24.7498	0.214333
3521	FCT-FA58	2.39405e-08	2.39405e-10	7.71036	3.72142	0.8	17.5	2.5	9.5762e+06	95762	3084.14	1488.57	3441.4	0.482652	23.0421	28.8027	0.230421
3527	FC-AD1	5.37731e-09	5.37731e-11	1.84798	1.00543	0.7283	42.5693	3.59213	1.49697e+06	14969.7	514.454	279.899	581.629	0.544071	21.3165	29.2689	0.213165
3539	FC-AD3	4.32022e-09	4.32022e-11	1.55321	0.280466	0.7179	40.9698	2.2985	1.87958e+06	18795.8	675.75	122.021	705.035	0.180572	22.053	30.7187	0.22053
3571	FCT-FA60	8.86444e-09	8.86444e-11	3.07597	1.31683	0.82	64.2	8.64	1.02598e+06	10259.8	356.015	152.411	392.594	0.428102	21.6363	26.3857	0.216363
4224	FCT-Nb3	3.94039e-09	3.94039e-11	1.43427	0.615475	0.831	68.81	1.07	3.68261e+06	36826.1	1340.44	575.21	1478.49	0.429122	20.6219	24.8157	0.206219
4226	FCT-Nb4	1.16629e-08	1.16629e-10	3.65147	1.83813	0.844	74.33	1.26	9.25629e+06	92562.9	2897.99	1458.83	3248.11	0.503393	23.5993	27.9613	0.235993
4228	FCT-Nb5	1.21496e-08	1.21496e-10	4.37341	1.7613	0.842	72.96	1.41	8.61677e+06	86167.7	3101.71	1249.15	3401.5	0.40273	20.9713	24.9065	0.209713
4240	FCT-Nb6	9.88941e-09	9.88941e-11	3.15396	1.5681	0.815	61.86	1.28	7.7261e+06	77261	2464.03	1225.08	2758.05	0.497184	23.1976	28.4633	0.231976
4242	FCT-Nb7	7.56934e-09	7.56934e-11	2.59596	1.46472	0.817	62.75	8.55	885303	8853.03	303.621	171.312	344.736	0.564231	21.2707	26.0351	0.212707
4256	FCT-Nb8	9.36089e-09	9.36089e-11	3.04486	1.51615	0.824	65.24	1.03	9.08824e+06	90882.4	2956.17	1471.99	3309.45	0.497939	22.741	27.5983	0.22741
4258	FCT-Nb9	6.38597e-09	6.38597e-11	2.28024	1.85593	0.781	52.25	5	1.27719e+06	12771.9	456.049	371.187	545.133	0.813919	19.42	24.8656	0.1942
4267	FCT-Nb10	4.27259e-09	4.27259e-11	1.35976	0.67191	0.795	55.22	7.11	600927	6009.27	191.245	94.5021	213.926	0.49414	23.2616	29.2599	0.232616
